1

1 **Soil, senescence and exudate utilisation: Characterisation of the**  
2 **Paragon var. spring bread wheat root microbiome**

3

4 Sam Prudence<sup>1†</sup>, Jake Newitt<sup>1†</sup>, Sarah F. Worsley<sup>2</sup>, Michael C. Macey<sup>3</sup>, J. Colin Murrell<sup>3</sup>,  
5 Laura E. Lehtovirta-Morley<sup>2\*</sup> and Matthew I. Hutchings<sup>1\*</sup>

6 <sup>†</sup>These authors contributed equally to this work

7 \*Correspondence [l.lehtovirta-morley@uea.ac.uk](mailto:l.lehtovirta-morley@uea.ac.uk); [matt.hutchings@jic.ac.uk](mailto:matt.hutchings@jic.ac.uk)

8

9 <sup>1</sup> Department of Molecular Microbiology, John Innes Centre, Norwich Research Park, Norwich.  
10 NR4 7UH

11 <sup>2</sup>School of Biological Sciences, University of East Anglia, Norwich Research Park, Norwich.  
12 NR4 7TJ

13 <sup>3</sup>School of Environmental Sciences, University of East Anglia, Norwich Research Park,  
14 Norwich. NR4 7TJ

15

16

17 **Abstract.**

18 Conventional methods of agricultural pest control and crop fertilisation are contributing to a  
19 crisis of biodiversity loss, biogeochemical cycle dysregulation, and ecosystem collapse. Thus,  
20 we must find ecologically responsible means to control disease and promote crop yields. The  
21 root-associated microbiome may contribute to this goal as microbes can aid plants with  
22 disease suppression, abiotic stress relief, and nutrient bioavailability. We applied 16S rRNA  
23 gene & fungal 18S rRNA gene (ITS2 region) amplicon sequencing to profile the diversity of  
24 the bacterial, archaeal & fungal communities associated with the roots of UK elite spring bread  
25 wheat variety *Triticum aestivum* var. Paragon in different soils and developmental stages. This  
26 revealed that community composition shifted significantly for all three groups across  
27 compartments. This shift was most pronounced for bacteria and fungi, while we observed  
28 weaker selection on the ammonia oxidising archaea-dominated archaeal community. Across  
29 multiple soil types we found that soil inoculum was a significant driver of endosphere  
30 community composition, however several bacterial families were identified as core enriched  
31 taxa in all soil conditions. The most abundant of these were *Streptomycetaceae* and  
32 *Burkholderiaceae*. Moreover, as the plants senesce, both families were reduced in  
33 abundance, indicating that input from the living plant was required to maintain their abundance  
34 in the endosphere. To understand which microbes are using wheat root exudates in the  
35 rhizosphere, root exudates were labelled in a  $^{13}\text{CO}_2$  DNA stable isotope probing experiment.  
36 This shows that bacterial taxa within the *Burkholderiaceae* family among other core enriched  
37 taxa, such as *Pseudomonadaceae*, were able to use root exudates but *Streptomycetaceae*  
38 were not. Overall, this work provides a better understanding of the wheat microbiome,  
39 including the endosphere community. Understanding crop microbiome formation will  
40 contribute to ecologically responsible methods for yield improvement and biocontrol in the  
41 future.

42

43

44 **Introduction.** Wheat is a staple crop for more than 4 billion people and globally accounts for  
45 more than 20% of human calorie and protein consumption [1]. This means that farming wheat,  
46 and the accompanying use of chemical fertilisers and pesticides, has a huge environmental  
47 impact worldwide. For example, up to 70% of nitrogen fertiliser is lost each year through run-  
48 off and microbial denitrification which generates the potent greenhouse gas N<sub>2</sub>O [2]. The  
49 challenge facing humans this century is to grow enough wheat to feed an increasing global  
50 human population while reducing our reliance on agrochemicals which contribute to climate  
51 change and damage ecosystems [3]. One possible way to achieve this is to manipulate the  
52 microbial communities associated with wheat and other crop plants. These communities are  
53 commonly referred to as “microbiomes” and a healthy microbiome can enhance host fitness  
54 by providing essential nutrients [4], increasing resilience to abiotic stressors [5], and protecting  
55 against disease [4]. Each new generation of plants must recruit the microbial species  
56 (archaea, bacteria, fungi and other micro-eukarya) that make up its root microbiome from the  
57 surrounding soil, and this means that the soil microbial community is an important determinant  
58 of plant root microbiome composition [6].

59       Plants are able to influence the microbial community in the rhizosphere, which is the  
60 soil most closely associated with the roots, and the endosphere, which is the inside of the  
61 roots. The microbes within these root-associated environments tend to have traits which  
62 benefit the host plant [7] and plants modulate these microbial communities by depositing  
63 photosynthetically fixed carbon into the rhizosphere in the form of root exudates, a complex  
64 mixture of organic compounds consisting primarily of sugars, organic acids, and fatty acids  
65 [8]. Plants deposit up to 40% of their fixed carbon into the soil [9], and there is evidence to  
66 suggest that certain molecules within these exudates can attract specific bacterial taxa  
67 [6,10,11]. Thus, the implication is that host plants attract specific microbial taxa from a diverse  
68 microbial soil community, and generate a root microbiome that contains only the subset of the  
69 soil community most likely to offer benefits to the host plant [12]. In return, the growth of  
70 beneficial microbes is supported by the nutrients from root exudates, such that the plants and

71 microbes exchange resources in a mutually beneficial symbiosis. Traditional plant breeding  
72 may have had a negative effect on this process in important food crops such as barley and  
73 wheat; for example, selection for traits such as increased growth and yield may have  
74 inadvertently had a negative influence on root exudation and microbiome formation [8,11].  
75 Long-term use of fertilizer also reduces the dependency of the host plant on microbial  
76 interactions, further weakening the selective pressure to maintain costly exudation of root  
77 metabolites [13]. This highlights the need for a greater understanding of the factors that  
78 underpin microbiome assembly and function in important domesticated crop species such as  
79 bread wheat, *Triticum aestivum*.

80 To understand the key functions in a host-associated microbial community, it can be  
81 useful to define the core microbiome, i.e. the microbial taxa consistently associated with a  
82 particular plant species regardless of habitat or conditions and which provide a service to the  
83 host plant and/or the broader ecosystem [14,15]. The core microbiome of the model plant  
84 *Arabidopsis thaliana* is well studied [6,16], and it has also been characterized for numerous  
85 other plant species to varying degrees [17–19]. In elucidating the core microbiome a number  
86 of factors must be accounted for, including soil type [20,21], developmental stage [22,23],  
87 genotype [8,22,24] and, in the case of crop plants, agricultural management strategy [23,25–  
88 27]. The core microbiome has been investigated for bread wheat [28–32] and, while most  
89 studies focus on the rhizosphere, Kuźniar *et al.* [28] identified a number of core bacterial  
90 genera within the endosphere including *Pseudomonas* and *Flavobacterium*. Their study  
91 focussed on a single soil type and developmental stage, but to reliably identify the core  
92 microbial taxa associated with wheat, more of the aforementioned factors must be analysed.  
93 Microbial community surveys are also often limited to investigations of bacterial or, in some  
94 cases, fungal diversity meaning that knowledge of wheat root community diversity is limited to  
95 these two groups. Root-associated archaea are considerably understudied, particularly within  
96 terrestrial plant species such as wheat. Most generic and commonly used 16S rRNA gene  
97 PCR primer sets fail to capture archaeal diversity [33], thus the diversity of archaea within soils  
98 is commonly overlooked. Key soil groups such as ammonia oxidizing archaea (AOA) play a

99 significant role in nitrogen cycling, a key ecological service, and one study has managed to  
100 link an AOA to plant beneficial traits [34], suggesting that the role of archaea within the  
101 terrestrial root associated microbiome warrants further study.

102 For many important crops such as wheat, barley, maize, corn, and rice, developmental  
103 senescence is a crucial determinant of yield and nutrient content [35,36]. Developmental  
104 senescence occurs at the end of the life cycle, and during this process, resources, particularly  
105 nitrogen, are diverted from plant tissues into the developing grain [35,36]. Senescence  
106 represents a dramatic shift in the metabolic activity of the plant [35] and in the regulation of  
107 pathways of pathogen defence [36,37]. Given that root exudation is a dynamic process [38],  
108 it would be reasonable to assume that senescence affects root exudation substantially,  
109 particularly because of the diversion of nitrogen to the developing grain (several major wheat  
110 root exudate compounds, like amino acids, nucleosides, and numerous organic acids, contain  
111 nitrogen [38]). To our knowledge, changes within the wheat root microbial community during  
112 wheat senescence have not been investigated previously. Given the pivotal role senescence  
113 plays in grain development and yields, microbial community dynamics during this process  
114 warrant investigation. At the onset of senescence, plant resources are redirected to the seed,  
115 root exudation is reduced, and root tissues start to decay. It is plausible that this shift in plant  
116 metabolism would cause a change in the root-associated microbiome, and greater  
117 understanding of this could come inform agricultural management strategies and the design  
118 of new crop cultivars.

119 One major limitation of metabarcoding approaches is that they do not reveal which  
120 microbial taxa are actively interacting with plants, for example via the utilisation of compounds  
121 exuded by the roots.  $^{13}\text{CO}_2$  DNA stable Isotope Probing (SIP) is a powerful tool for investigating  
122 the role of root exudates in microbiome assembly. As plants are incubated with  $^{13}\text{CO}_2$ , the  
123 heavy carbon is fixed and incorporated into exuded organic compounds. Microbial  
124 communities that actively metabolise root exudates will incorporate  $^{13}\text{C}$  into their DNA and can  
125 thus be identified [9,39]. While numerous DNA-SIP studies have probed metabolically active  
126 communities associated with wheat, few have assessed root exudate metabolism directly

127 using high-throughput sequencing methods for microbial identification [40,41]. Of the two  
128 studies that have, similar findings were presented but with some distinct differences. Both  
129 studies showed that exudate-metabolising microbial communities in the rhizosphere consisted  
130 primarily of Actinobacteria and Proteobacteria [42,43]. Taxa from Burkholderiales specifically  
131 were shown to dominate exudate metabolism in one study [42], whereas the other highlighted  
132 *Paenibacillaceae* as exudate metabolisers within the rhizosphere [43]. Discrepancies between  
133 these studies likely result from different soil types and wheat genotypes, and this demonstrates  
134 a need for further DNA-SIP experiments using different soils and different wheat varieties.

135 In this study we characterised the rhizosphere and endosphere microbiomes of  
136 *Triticum aestivum* variety Paragon, an UK elite spring bread wheat, using metabarcoding and  
137 <sup>13</sup>CO<sub>2</sub> DNA-SIP. Although wheat rhizosphere bacterial communities have been well  
138 characterised under a wide range of conditions [22,24,29–31,44], few studies have surveyed  
139 the endosphere community. Here, we profile the archaeal, bacterial and fungal communities  
140 in the bulk soil, rhizosphere and endosphere compartments of *T. aestivum* var. Paragon using  
141 16S rRNA gene and ITS2 amplicon sequencing. We further characterise the bacterial  
142 communities using <sup>13</sup>CO<sub>2</sub> DNA-SIP. We aimed to address the following questions: (1) Are  
143 there any core microbial taxa within the endosphere and rhizosphere of *T. aestivum* var.  
144 Paragon across starkly contrasting soil environments? (2) How does the community change  
145 as the plant enters developmental senescence, and which microbial taxa, if any, are unable  
146 to persist through senescence? (3) Do wheat roots select for specific archaeal lineages as  
147 they do for bacteria and fungi? (4) Which bacterial taxa utilise wheat root exudates? The  
148 results provide a significant advance towards understanding wheat-microbiome interactions  
149 and establishing an understanding of the core microbial taxa in *T. aestivum* var. Paragon.

150

151

152

153

154

## 155 **Results**

156 **The microbial community associated with *Triticum aestivum* var. Paragon.** To gain initial  
157 insights into the microbial communities associated with wheat roots, we characterised the  
158 microbial community associated with field-grown wheat sampled during the stem elongation  
159 growth phase. The diversity of microbes in the bulk soil, rhizosphere, and endosphere  
160 compartments was investigated using 16S rRNA gene (for bacteria and archaea) and ITS2  
161 (for fungi) metabarcoding, respectively. The bacterial and fungal communities differed  
162 significantly across compartments (bacterial PERMANOVA:  $R^2=0.8$ ,  $p < 0.01$ ; fungal  
163 PERMANOVA:  $R^2=0.63$ ,  $p < 0.01$ ). This was particularly the case for the rhizosphere and  
164 endosphere compartments compared to bulk soil, as demonstrated by principal coordinates  
165 analysis (PCoA) (Figure 1; A1, A3). Community profiles did not indicate a strong shift in the  
166 archaeal community across compartments at the family level (Figure 2; C1), but statistical  
167 analysis indicated a significant effect of compartment on archaeal community composition at  
168 the OTU level (archaeal PERMANOVA:  $R^2=0.66$ ,  $p < 0.01$ ), with PCoA indicating that  
169 differences in the endosphere may mostly be responsible for this shift (Figure 1; A2). For the  
170 bacterial community, the family *Streptomycetaceae* showed the greatest average relative  
171 abundance in the endosphere (25.12%), followed by *Burkholderiaceae* (11.99%) and  
172 *Sphingobacteriaceae* (7.75%). In the rhizosphere the relative abundance of  
173 *Streptomycetaceae* was much lower (2.58%), while *Micrococcaceae* were most abundant  
174 (8.43%), followed by *Burkholderiaceae* (7.41%) and *Sphingobacteriaceae* (6.58%) (Figure 2;  
175 A1). The fungal endosphere community was dominated by the Xyariales order (32.9%),  
176 followed by the class Sordariomycetes (14.33%), then the *Metarhizium* (10.44%). For the  
177 rhizosphere, however *Metarhizium* had the greatest relative abundance (27.36%), followed by  
178 the Chaetothyriales order (12.32%) and the Sordariomycetes (9.23%). The archaeal  
179 community was overwhelmingly dominated by the AOA family *Nitrososphaeraceae*  
180 (endosphere 89.77%, rhizosphere 81.55%). Differential abundance analysis demonstrated  
181 that the abundance of fourteen bacterial families, including *Streptomycetaceae*,  
182 *Burkholderiaceae* and *Sphingobacteriaceae*, increased significantly within the rhizosphere

183 and/or the endosphere relative to the bulk soil (Figure 2; A, Figure 3; A1). The families  
184 *Streptomycetaceae* (16.4% contribution,  $p < 0.01$ ) and *Burkholderiaceae* (6.1% contribution,  
185  $p < 0.01$ ) were the two most significant contributors to the bacterial community shift as  
186 confirmed by SIMPER analysis (Supplementary Table 1). For the fungal community, most  
187 significantly differentially abundant groups were reduced in abundance compared to in the  
188 bulk soil, however one taxon was significantly more abundant in the rhizosphere  
189 (*Mortierellaceae*), and one was significantly more abundant in the endosphere (*Parmeliaceae*)  
190 (Figure 3; A2). No significantly differentially abundant archaeal families were found.

191 Quantitative PCR (qPCR) was used to estimate the total abundance of archaeal and  
192 bacterial 16S rRNA genes and fungal 18S rRNA genes (Figure 2; D). This showed that  
193 bacterial 16S rRNA gene copy number was significantly greater within the bulk soil and the  
194 rhizosphere compartments when compared to the endosphere (Tukey's HSD,  $p < 0.01$  for  
195 both comparisons). Fungi outnumbered bacteria and archaea by more than an order of  
196 magnitude within the endosphere (Figure 2; D). This may indicate that fungi are more  
197 abundant within the endosphere but could also be a product of the higher 18S rRNA gene  
198 copy number per genome within some fungi [45]. When comparing bulk soil to the endosphere,  
199 archaeal 16S rRNA gene copy number decreased by two orders of magnitude in the  
200 endosphere, while the fungal 18S rRNA gene copy number increased by two orders of  
201 magnitude. Despite this, root compartments were not found to significantly influence the  
202 abundance of archaea or fungi (ANOVA,  $p > 0.05$ ). This is likely due to high variation across  
203 the replicates and could indicate more stochastic root colonisation by fungi and archaea.  
204 Compared to bacteria or fungi there were at least three orders of magnitude fewer archaeal  
205 16S rRNA gene copies detected within the endosphere. Despite the lower 16S rRNA gene  
206 copy number found in most archaeal genomes [46] this likely demonstrates archaea colonise  
207 the root in much lower numbers than the other root microbiota.

208

209 **The effect of developmental senescence on the root community.** We next aimed to  
210 investigate the effect of developmental senescence on the root microbial community and,



211 specifically, to identify microbial taxa associated with the roots of living plants that decline in  
212 number during senescence. Developmental senescence is the final stage in wheat  
213 development and the point at which nutrients become remobilised from the plant into the  
214 developing grain. At this point the plants are no longer green or actively growing. Senescent  
215 plants were sampled from the same site as the plants sampled during stem elongation growth  
216 phase. Analysis of rRNA gene copy number (from qPCR experiments) showed that plant  
217 growth phase significantly influenced the abundance of bacteria (growth phase in a linear  
218 model: F-value = 4.86,  $p < 0.05$ ) and archaea (F-value = 10.55,  $p < 0.01$  in a linear model)  
219 within the root microbiome (Figure 2; D). Comparing specific compartments for each group  
220 showed that, while there was no significant difference in the abundance of bacteria within the  
221 bulk soil or rhizosphere sampled at either growth phase (Tukey's HSD,  $p > 0.05$ ), the  
222 abundance of bacteria increased significantly within the endosphere after senescence  
223 (Tukey's HSD,  $p < 0.001$ ). Fungal 18S was significantly reduced in the rhizosphere after  
224 senescence (Tukey's HSD,  $p < 0.05$ ) but increased by an order of magnitude in the  
225 endosphere, although this increase was not statistically significant (Tukey's HSD,  $p > 0.05$ ),  
226 likely due to variation across replicates. For archaea there were no statistically significant  
227 differences in 16S rRNA gene copy number between the two growth phases for any  
228 compartment. Both fungal and bacterial community composition differed significantly across  
229 the three different root compartments of senescent plants, as clearly demonstrated by PCoA  
230 (Figure 1; B1, B2, B3) and PERMANOVA analysis for all three microbial groups  
231 (Supplementary Table 2). In addition to this, PCoA showed a clear difference between the  
232 microbial communities associated with senescent or stem elongation growth phase plants,  
233 however, they also indicated that the root community was much more variable for senescent  
234 plants compared to those in the stem elongation phase (Figure 1; C1, C2, C3). PERMANOVA  
235 analysis corroborates this observation as, whilst this showed a significant effect of plant growth  
236 phase on overall community composition for all three microbial groups (PERMANOVA,  
237 bacterial:  $R^2=0.47$ ,  $p < 0.001$ , archaeal:  $R^2=0.89$ ,  $p < 0.001$ , fungal:  $R^2=0.42$ ,  $p < 0.001$ ),  
238 betadisper analysis indicated that microbial community dispersion was not equal between the

239 two growth phases ( $p < 0.01$  for all), i.e. the senescent growth phase showed greater  
240 community variability compared to the stem elongation phase.

241 For individual taxa, differential abundance analysis showed that sixteen bacterial and  
242 fungal taxa were significantly less abundant within the endosphere of senesced plants than at  
243 the stem elongation growth phase ( $p < 0.05$ , Supplementary Table 14). The largest change in  
244 abundance was a two-fold reduction in the family *Streptomycetaceae* and there was also a  
245 significant reduction in the relative abundance of the families *Burkholderiaceae* and  
246 *Sphingobacteriaceae* in senescent plants (Figure 3; A1, B). This implies that these taxa may  
247 require input from the living plant in order to persist within the endosphere. No archaeal taxa  
248 demonstrated significant changes in abundance across root compartments between growth  
249 phases. The archaeal community was consistently dominated by the AOA family  
250 *Nitrososphaeraceae*. For the fungal community, differential abundance analysis indicated that  
251 the abundance of most taxa was significantly reduced in senescent plants, with the exception  
252 of *Chaetosphaeriaceae* which showed a four-fold increase during senescence when  
253 compared to the stem elongation phase.

254

255 **Laboratory-grown *Triticum aestivum* var. Paragon plants provide an agriculturally**  
256 **relevant model.** Root associated microbial communities can be influenced by a multitude of  
257 abiotic factors, including crop cultivation practices and climatic conditions [47]. To test whether  
258 the microbiomes of laboratory-grown plants are comparable to those grown in the field, plants  
259 were grown for four weeks under laboratory conditions in soil collected from the Church Farm  
260 site and the composition of the root microbiome was profiled using 16S rRNA gene and ITS2  
261 metabarcoding. Laboratory-grown plants were sampled during root growth phase, whereas  
262 field plants were sampled during the late stem elongation growth phase, meaning laboratory-  
263 grown plants were sampled much earlier in the life cycle. However, the same major microbial  
264 families were present within the endosphere of both groups of plants (Figure 2; A, B, C). PCoA  
265 plots indicated a shift in the endosphere community when comparing field to pot grown wheat

266 (Figure 1; D1, D2, D3). However, whilst statistical analysis did indicate a significant difference  
267 between the overall bacterial and fungal communities associated with the two groups of plants  
268 (PERMANOVA, bacterial:  $R^2=0.12$ ,  $p < 0.001$ , fungal:  $R^2=0.13$ ,  $p < 0.01$ , archaeal:  $R^2=0.13$ ,  $p$   
269  $> 0.05$ ), subsequent pairwise analysis found no significant difference between any specific  
270 compartments (Supplementary Table 2). qPCR indicated that the overall abundance of  
271 bacteria and archaea was significantly different between the two groups of plants ( $p < 0.05$  in  
272 linear models for both microbial groups). While there were significantly more archaea within  
273 the bulk soil associated with pot-grown plants (Tukey's HSD,  $p < 0.01$ ) post-hoc analysis did  
274 not show a significant difference in the abundance of either archaea or bacteria in the root  
275 associated compartments between the different groups of plants (Tukey HSD,  $p > 0.05$  for all).  
276 A significantly greater quantity of fungi was detected within the rhizosphere of laboratory-  
277 grown plants (Tukey's HSD,  $p < 0.05$ ) and we also observed lower quantities of all groups  
278 within the endosphere (Figure 2; D). Overall, this analysis shows that there is likely a lower  
279 microbial abundance within the endosphere of laboratory-grown root growth phase plants, but  
280 that any effects on community composition were subtle and mostly restricted to low abundance  
281 taxa. As bacterial, fungal, and archaeal communities contained the same major taxa within  
282 the endosphere, we conclude that laboratory-grown plants could serve as an approximate  
283 experimental analogue for agriculturally cultivated wheat plants when studying the  
284 composition of the root microbial community.

285

286 **Does *Triticum aestivum* var. Paragon select for specific microbial taxa?** Microbial  
287 communities and their functions can differ dramatically between different soils and, as a  
288 consequence, soil parameters play a central role in shaping the microbial communities  
289 associated with plants [20,48]. To determine if the enrichment of specific microbial taxa and,  
290 in particular, the dominance of *Streptomycetaceae* and *Burkholderiaceae*, within the wheat  
291 root endosphere was driven by the soil community or by the host, *T. aestivum* var. Paragon  
292 was grown in the contrasting soil types (agricultural soil or compost), and a 50:50 mixture of  
293 the two. It was reasoned that if *Streptomycetaceae* and *Burkholderiaceae* were dominant only

294 in the agricultural soil and the mixed soil, then certain strains within the agricultural soil might  
295 be particularly effective at colonising the endosphere. However, if *Streptomycetaceae* and  
296 *Burkholderiaceae* were dominant in the endosphere across all three soil conditions, this would  
297 indicate that when present, this family is selectively recruited to the wheat root microbiome.  
298 The microbiome was compared between four-week-old (root growth phase) plants grown in  
299 Church Farm agricultural soil, Levington F2 compost, and a 50:50 (vol/vol) mix of the two soils  
300 under laboratory conditions. Church Farm soil and Levington F2 compost are starkly  
301 contrasting soil environments: the agricultural soil is mildly alkaline (pH 7.97), contained only  
302 2.3% organic matter and was relatively low in inorganic nitrogen, magnesium and potassium.  
303 Levington F2 compost is acidic (pH 4.98) and has a high organic matter content (91.1%) as  
304 well as higher levels of inorganic nitrogen, phosphorus, potassium and magnesium  
305 (Supplementary Table 3).

306 It is well documented that the soil microbial community is a major determinant of  
307 endosphere community composition, as endophytic microbes are acquired by plants from the  
308 soil [6]. The present study corroborates this observation as PCoA showed clear clustering of  
309 communities by soil type, indicating that soil type was an important determinant of the root-  
310 associated community composition (Figure 1; E1, E2, E3). For the bacterial and archaeal  
311 communities, PERMANOVA corroborated a significant effect of soil type on bacterial  
312 community composition for all compartments (Supplementary Table 2). For the fungal  
313 community, PERMANOVA also showed significant effect of soil type on the bulk soil and  
314 rhizosphere communities (Supplementary Table. 2). For plants cultivated in Levington F2  
315 compost, no data on the fungal community composition within the endosphere could be  
316 retrieved. Thus, no statistical comparison could be made. The bacterial communities were  
317 distinct between the bulk soil, rhizosphere, and endosphere. This indicated that, while the soil  
318 had a significant impact on the composition of the root associated communities, the plant also  
319 selects for specific microbial taxa in all the tested soils (Figure 1; E1). PCoA showed a  
320 detectable rhizosphere effect (Figure 1; E1) but, consistent with previous studies [24,30], we  
321 observed a rhizosphere effect for *T. aestivum* var. Paragon that was subtle as there were only

322 minor differences between the community composition of bulk soil and rhizosphere  
323 communities (Figure 2; A, B, C). A SIMPER test revealed that, regardless of soil type,  
324 *Streptomycetaceae* (14.6% contribution,  $p < 0.01$ ) and *Burkholderiaceae* (10.1% contribution,  
325  $p < 0.01$ ) were the main taxa driving the community shift from bulk soil to endosphere  
326 (Supplementary Table 1). This is supported by the fact that *Streptomycetaceae* and  
327 *Burkholderiaceae* were major components of the endosphere bacterial communities under all  
328 conditions (Figure 2). Differential abundance analysis demonstrated a significant increase in  
329 the abundance of bacterial families *Burkholderiaceae*, *Chitinophagaceae*,  
330 *Pseudomonadaceae*, *Rhizobiaceae* and *Streptomycetaceae* within the rhizosphere and/or  
331 endosphere across all soil types (Figure 3; C). Enrichment of these groups was correlated with  
332 the reduced abundance of some fungal taxa loosely associated with pathogenicity within the  
333 endosphere and rhizosphere (*Australiascaceae* [49], *Glomerellaceae* [50,51] and *Hypocreale*  
334 [52]), and an increased abundance of one taxon loosely associated with beneficial mycorrhiza  
335 (*Leotiaceae* [53–55]) (Figure 3; C).

336 Further to this, qPCR experiments were performed to compare the abundance of  
337 archaea, bacteria, and fungi within the roots of plants cultivated in the agricultural soil or  
338 Levington F2 compost. No significant effect of soil type was observed for either fungi or  
339 bacteria (ANOVA,  $p > 0.05$  for both) (Figure 2; D). However, soil type had a significant effect  
340 on the abundance of archaea ( $p < 0.001$ ); there were significantly greater numbers of archaea  
341 within the agricultural bulk soil and rhizosphere compartments when compared to those for  
342 Levington F2 compost (Tukey's HSD,  $p < 0.001$  for both), but there was no significant  
343 difference in the archaeal load detected within the endosphere (Tukey's HSD,  $p > 0.05$ ). The  
344 lower abundance of archaea within Levington F2 compost is surprising given the higher  
345 nutrient levels in this soil, and particularly the higher levels of ammonium (Supplementary  
346 Table 3).

347 The archaeal community was dominated by two families of AOA (*Nitrososphaeraceae*  
348 and *Nitrosotaleaceae*), which were abundant in all root compartments. *Nitrosotaleaceae*  
349 dominated in the more acidic Levington F2 compost whereas *Nitrososphaeraceae* was most

350 abundant in the neutral pH Church Farm soil (Figure 2; C). While soil type was a major  
351 determinant of community composition, no selection of specific archaeal lineages within the  
352 endosphere was detected by SIMPER or differential abundance analysis, and PCoA did not  
353 show a strong effect of compartment on community composition (Figure 1; E2). Contrary to  
354 this, there was a small but significant shift in the archaeal community composition overall  
355 across compartments (archaeal PERMANOVA:  $R^2=0.86$ ,  $p = 0.001$ ), and a betadisper  
356 analysis was not significant ( $p > 0.01$ ), demonstrating this was not due to difference in  
357 dispersion between compartments (Figure 2; C2). Together, these findings might suggest that  
358 there is no major selection of archaeal taxa by the wheat roots. However, denaturing gradient  
359 gel electrophoresis (DGGE) analysis performed on the archaeal 16S rRNA and *amoA* genes  
360 showed a clear shift in the archaeal community across compartments (Supplementary Figure  
361 1). Unfortunately the archaeal 16S rRNA gene database lacks the established framework of  
362 its bacterial counterpart [56] and this, coupled with the lack of known diversity or strain  
363 characterisation within many archaeal taxa, makes it difficult to achieve good taxonomic  
364 resolution from short read amplicon sequencing of the archaeal 16S rRNA gene. We  
365 hypothesised therefore that this discrepancy between DGGE and amplicon sequencing arose  
366 from the lack of detailed taxonomic representation within the database used to analyse the  
367 sequencing data. Despite these limitations, this study has revealed that AOA dominate the  
368 archaeal community associated with wheat roots regardless of soil type, and that the  
369 abundance of archaea within the root is highest in agricultural soil and increases later in the  
370 life cycle of the plant.

371

372 **Identification of root exudate utilising microbes using  $^{13}\text{CO}_2$  DNA stable isotope**  
373 **probing.** Plants exude 30-40% of the carbon they fix from the atmosphere as root exudates  
374 [9]. These compounds can be utilised as a carbon source by microbes residing within and in  
375 the vicinity of the root and root exudates could be tailored by the plant to select particular  
376 microbial species from the soil. Thus, we aimed to identify the microbial taxa that wheat can  
377 support via  $^{13}\text{CO}_2$  DNA SIP. Briefly, wheat was incubated in  $^{13}\text{CO}_2$  for two weeks. During this

378 period, the “heavy”  $^{13}\text{C}$  becomes photosynthetically fixed into carbon-based metabolites  
379 and some of these  $^{13}\text{C}$  labelled compounds are exuded from the roots. Microbial utilisation of  
380 these compounds will, in turn, result in the  $^{13}\text{C}$  label being incorporated into the DNA backbone  
381 of actively growing microorganisms. Heavy and light DNA can be separated via density  
382 gradient ultracentrifugation and the fractions are then analysed using amplicon sequencing to  
383 identify metabolically active microbes. The two-week labelling period was chosen to minimise  
384 the probability of labelling via cross feeding by secondary metabolisers [39,57]. Labelling of  
385 the bacterial community in the rhizosphere and endosphere was confirmed using DGGE  
386 (Supplementary Figures 2 and 5), then heavy and light fractions were pooled and analysed by  
387 16S rRNA gene sequencing (as defined in Supplementary Table 4). The same DGGE  
388 experiment was performed using primers targeting archaea and did not indicate labelling and  
389 therefore no sequencing of archaea was carried out (Supplementary Figure 3). For fungi, PCR  
390 amplification of the ITS2 region for DGGE did not consistently yield products for all fractions,  
391 thus DGGE could not be performed. Instead, qPCR was used and did not detect labelling of  
392 the fungal community (Supplementary Figure 4) so no sequencing was performed for the  
393 fungal community.

394 PCoA indicated that bacterial communities within endosphere samples were highly  
395 variable (Supplementary Figure 5) and there was no significant difference between  $^{13}\text{C}$ -  
396 labelled heavy and light fractions (PERMANOVA:  $R^2=0.29$ ,  $p > 0.1$ ). This means the  
397 endosphere dataset was too variable to draw any conclusions from the current study about  
398 the utilisation of host derived carbon within the endosphere (Supplementary Figure 5). For the  
399 rhizosphere however, the replicates were consistent, and PCoA revealed that the bacterial  
400 community in the  $^{13}\text{C}$  heavy fraction was distinct from that of the  $^{12}\text{C}$  heavy DNA (control)  
401 fraction and distinct from the  $^{13}\text{C}$  DNA and  $^{12}\text{C}$  light DNA fractions (Figure 4). In addition, the  
402 community was significantly different in the  $^{13}\text{C}$  heavy DNA fraction compared to the unlabelled  
403 samples, suggesting that a distinct subset of bacteria was incorporating root-derived carbon  
404 (PERMANOVA:  $R^2= 0.59$ ,  $p < 0.001$ ). To control for  $\text{CO}_2$  fixation by soil autotrophs the  $^{13}\text{C}$   
405 heavy fraction was compared to a  $^{13}\text{C}$  unplanted soil control using PCoA; this analysis



406 indicated that the  $^{13}\text{C}$  heavy DNA fraction was distinct from the  $^{13}\text{C}$  bulk soil control (Figure 4).  
407 After these comparisons, we could be confident that the shift in community composition within  
408 the  $^{13}\text{C}$  heavy DNA fraction was driven by microbes within the rhizosphere actively utilising  
409 root exudates. Differential abundance analysis was performed to identify the taxa driving these  
410 shifts. Exudate metabolisers were defined as taxa showing significantly greater abundance  
411 within  $^{13}\text{C}$  heavy DNA fractions when compared with both the  $^{13}\text{C}$  light fractions and the  $^{12}\text{C}$   
412 control heavy fractions. Above the abundance threshold, we identified 9 exudate-utilising  
413 bacterial taxa (Figure 6, Supplementary Table 5). While *Streptomycetaceae* were not among  
414 these, *Pseudomonadaceae* were utilising root exudates, as were two other bacterial taxa  
415 (*Comamonadaceae* and *Oxalobacteriaceae*) which likely belonged to the *Burkholderiaceae*.  
416 As defined by the Genome Taxonomy Database [58], *Comamonadaceae* and  
417 *Oxalobacteriaceae* are now classified as genera *Comamonas* and *Oxalobacter* within the  
418 *Burkholderiaceae* family. Within the  $^{13}\text{C}$  unplanted soil control, differential abundance analysis  
419 indicated that six taxa were significantly enriched in the heavy DNA fraction compared to the  
420 light fraction these taxa are hypothesised to fix  $^{13}\text{CO}_2$  autotrophically (Supplementary Table  
421 10). Only one taxon was  $^{13}\text{C}$ -labelled in both the rhizosphere and unplanted soil,  
422 *Intrasporangiaceae*, and thus was excluded from the list of root exudate utilising bacterial taxa.  
423 While microbes belonging to this family are capable of photosynthesis, they also have  
424 genomes with high GC content, and as such they may be overrepresented in heavy fractions.

425

## 426 **Discussion**

427 In this work we profiled the microbial communities in the rhizosphere and endosphere of the  
428 UK elite Spring bread wheat *T. aestivum* variety Paragon. We identified the core microbial  
429 families associated with the rhizosphere and endosphere of these plants and the subset of  
430 microorganisms assimilating plant-derived carbon in the rhizosphere. This study revealed that  
431 plant developmental senescence induces shift in the root-associated microbial communities  
432 and an increase in microbial abundance in the plant endosphere. Concurrent with established  
433 literature [6,21,59] we found the soil inoculum to be a major driver of root community



434 composition. Given the contrasting range of soils, wheat varieties, developmental timepoints,  
435 and growth management strategies used across studies, drawing direct comparisons is often  
436 challenging. For example Schlatter *et al.* identified *Oxolabacteraceae*, *Comamonadaceae* and  
437 *Chitinophaga* as core rhizobacteria for the wheat cultivar *Triticum aestivum* L. cv. Louise [29].  
438 Our work corroborates this observation for *T. aestivum* var. Paragon, all these taxa were  
439 identified by SIP as exudate utilising microbes. However, many of the core taxa identified by  
440 Schlatter *et al.* were not identified by the present work. Similarly, for the endosphere  
441 community, Kuźniar and colleagues identified *Flavobacterium*, *Janthinobacterium*, and  
442 *Pseudomonas* as core microbiota for both cultivars tested, and *Paenibacillus* as a core taxon  
443 for *T. aestivum* L. cv. Hondia [28]. We identified *Pseudomonadaceae* as a core component of  
444 the *T. aestivum* var. Paragon endosphere microbiome and, while *Paenibacillaceae* were not  
445 enriched in the endosphere consistently, we did identify this family as an exudate utiliser within  
446 the rhizosphere. *Streptomycetaceae* were not identified by the study of Kuźniar and  
447 colleagues. While these combined results consistently imply a role for common taxa such as  
448 *Pseudomonadaceae* or members of the *Burkholderiaceae* family, it cannot explain the  
449 differences observed in colonisation by other taxa, and in particular *Streptomycetaceae*. While  
450 it is likely this is largely driven by soil type, there is some evidence that for wheat, similarly to  
451 barley [11], plant genotype may be responsible for these differences [24,28,32,44]. In a study  
452 which used the same Church Farm field site as our work, *T. aestivum* var. Paragon was  
453 previously reported to be an outlier compared to other wheat varieties, with a particularly  
454 distinct rhizosphere and endosphere community [24]. Further studies are needed to fully  
455 assess how wheat rhizosphere and endosphere communities vary across different wheat  
456 cultivars and soil environments, and which of these factors has the greatest influence.

457         While only slight differences were observed between root-growth phase laboratory  
458 cultivated plants and stem elongation phase field cultivated plants, significant changes in the  
459 abundance of numerous bacterial and fungal taxa occurred at the onset of plant  
460 developmental senescence. To our knowledge, the wheat root community has not previously  
461 been assessed after senescence, though development has been shown to significantly alter

462 the wheat rhizosphere community [22,23]. One fungal group, *Chaetosphaeriaceae*, was  
463 significantly enriched as the plant senesced. This family represents a relatively diverse group  
464 of fungi, although members of this group such as *Chaetosphaeria* are known to reproduce  
465 within decomposing plant tissues, which may explain the four-fold increase in abundance after  
466 senescence [60]. In terms of the overall fungal community composition (Figure 2; B1), the  
467 greatest change during senescence was in the Pleosporales group, and this may also  
468 contribute to the observed increase in fungal abundance during senescence. This group was  
469 excluded from the differential abundance analysis which focused on lower taxonomic ranks.  
470 Pleosporales is an order of fungi containing over 28 families [61], and such a high diversity  
471 makes the ecological role of this group difficult to postulate. Some families within the  
472 Pleosporales are associated with endophytic plant parasites [61], including necrotrophic  
473 pathogens of wheat *Pyrenophora tritici-repentis* and *Parastagonospora nodorum* [62].  
474 Necrotrophic pathogens specialise in colonising and degrading dead plant cells, and  
475 senescent tissues are thought to provide a favourable environment for necrotrophs [37]. It is  
476 interesting to note that this increased fungal colonisation correlated with reduced abundance  
477 of fungi-suppressive endophytic bacteria such as *Streptomycetaceae* [63,64] and  
478 *Burkholderiaceae* [65] during developmental senescence. The present work, however, cannot  
479 provide any direct evidence of a causative relationship driving this correlation.

480 *Burkholderiaceae*-family taxa (*Comamonadaceae* and *Oxalobacteriaceae*), and  
481 *Pseudomonadaceae* were identified as potential root exudate utilisers within the rhizosphere,  
482 in agreement with previous studies [42,66]. These bacterial groups were also consistently  
483 enriched in the rhizosphere or endosphere, regardless of soil type. These results imply these  
484 families may be selectively recruited to the plants via root exudates, which support  
485 *Burkholderiaceae* and *Pseudomonadaceae* via photosynthetically fixed carbon. The  
486 *Pseudomonadaceae* family contains a diverse range of plant-beneficial and plant pathogenic  
487 strains [67,68] but the literature correlates exudate utilisation with microbial functions which  
488 benefit the host plant [69,70], and exudates can have a negative effect on plant pathogens  
489 [12]. While the mechanism of this selectivity remains unknown, it is likely these exudate

490 utilisers are plant beneficial strains. Well studied representatives of this family with plant  
491 growth promoting traits include *Pseudomonas brassicacearum* [71] and *Pseudomonas*  
492 *fluorescens* [72]. Most of the exudate utilising families identified in the present work were fast  
493 growing Gram-negative bacteria. As observed by Worsley and colleagues (bioRxiv [73]),  
494 faster growing organisms are labelled more readily within a two-week incubation period. Due  
495 to their faster growth rates, these microorganisms can more easily monopolise the plant  
496 derived carbon within the rhizosphere and incorporate  $^{13}\text{C}$  into the DNA backbone during DNA  
497 replication. Slower growing organisms such as *Streptomycetaceae* are likely outcompeted for  
498 root derived resources in the rhizosphere or the two-week incubation period may be too short  
499 to allow the incorporation of the  $^{13}\text{C}$  label into DNA.

500 *Streptomycetaceae* were the most abundant of the core endosphere enriched  
501 families, despite not incorporating root derived carbon in the rhizosphere. This family is  
502 dominated by a single genus, *Streptomyces*. These filamentous Gram-positive bacteria are  
503 well known producers of antifungal and antibacterial secondary metabolites, and members of  
504 the genus have been shown to promote plant growth [64], have been correlated with increased  
505 drought tolerance [74], and can protect host plants from disease [63,64]. *Streptomyces*  
506 species make up the active ingredients of horticultural products Actinovate and Mycostop and  
507 it has been proposed that plant roots may provide a major niche for these bacteria which are  
508 usually described as free-living, soil dwelling saprophytes. In this study *Streptomycetaceae*  
509 accounted for up to 40% of the bacteria present in the endosphere for some plants.  
510 Intriguingly, after the plants senesced, there was a two-fold reduction in the abundance of  
511 *Streptomycetaceae* within the endosphere. This a surprising result for a bacterial group  
512 typically associated with the breakdown of dead organic matter within soils [75]. As plants  
513 senesce and die, a process of ecological succession occurs, where the tissues are colonised  
514 by different microbes (particularly fungi) successively as different resources within the plant  
515 tissues are degraded [76,77]. The first microorganisms to colonise will be those rapidly  
516 metabolising sugars and lipids, followed later by more specialist organisms which will  
517 breakdown complex molecules like lignin and cellulose. While these later stages are typically

518 attributed to fungi, *Streptomycetaceae* are known to degrade complex plant derived molecules  
519 such as hemicellulose and insoluble lignin [75,78]. It could be that our sampling timepoint (late  
520 in the developmental senescence process, but prior to most biomass degradation) was too  
521 early in this succession process for any biomass fuelled *Streptomycetaceae* proliferation to  
522 be obvious. This however cannot explain the reduced abundance of *Streptomycetaceae* in  
523 senesced roots compared to the actively growing plants. This might be explained by a lack of  
524 active input from the plant, as the host senesces and resources are diverted to the developing  
525 grain [35] host derived resources may no longer be available to support *Streptomycetaceae*  
526 growth in the endosphere. The DNA-SIP experiment indicated that *Streptomycetaceae* did not  
527 utilise root exudates under the selected experimental conditions, which contradicts the  
528 findings of Ai and colleagues [43]. It must be noted that while *Streptomycetaceae* were not  
529 labelled in the DNA-SIP experiment, this experiment focused on the rhizosphere, and our data  
530 demonstrated that *Streptomycetaceae* primarily colonise the endosphere.

531 Further SIP experiments exploring the endosphere community, with more replicates to  
532 account for the high variability, may help to determine whether *Streptomycetaceae* can utilise  
533 plant derived carbon within the endosphere, and if the loss of these resources explains their  
534 reduced presence during senescence. Future studies should also investigate how  
535 *Streptomycetaceae* are able to colonise and survive within the endosphere of wheat. During  
536 developmental senescence, nitrogen is the main resource diverted to the developing grain  
537 [35]. It is possible that nitrogen, not carbon, is the resource provided by the host plant to  
538 support *Streptomycetaceae* growth. There is precedent for host-derived metabolites such as  
539 amino acids or gamma-aminobutyric acid (GABA) acting as a nitrogen source for root  
540 associated microbes [70,79]. Additionally, there is evidence that the increased use of nitrogen  
541 fertilizer (which correlates with greater total root exudation) was negatively correlated with the  
542 abundance of *Streptomycetaceae* in the rhizosphere [23]. In the future, <sup>15</sup>N-nitrogen DNA or  
543 RNA-SIP could be used to explore whether *T. aestivum* var. Paragon is able to support  
544 *Streptomycetaceae* within the endosphere via nitrogen containing, host-derived metabolites.

545 In conclusion: (1) We identified five core microbial taxa associated within the  
546 rhizosphere and endosphere of *T. aestivum* var. Paragon, *Streptomycetaceae*,  
547 *Burkholderiaceae*, *Pseudomonadaceae*, *Rhizobiaceae* and *Chitinophagaceae*. The  
548 consistency of the enrichment of these groups across the soil types and plant growth stages  
549 we tested strongly indicates that they are core taxa associated with Paragon var. *T. aestivum*.  
550 This, however, cannot be extrapolated to other varieties of wheat, and one study even  
551 suggests *T. aestivum* var. Paragon is an outlier with a particularly distinct microbiome [24]. To  
552 gain a more detailed understanding of which microbial taxa are associated with the roots of  
553 spring bread wheat, more genotypes must be analysed. (2) At the onset of developmental  
554 senescence, significant reductions in the abundance of many taxa were observed, including  
555 the whole core endosphere and rhizosphere microbiome. In particular, *Streptomycetaceae*  
556 abundance was reduced two-fold. This may indicate that active input from the host is required  
557 to maintain the abundance of certain families within the endosphere. A significant increase in  
558 the total abundance of bacteria and archaea was evident during senescence and potentially  
559 increased colonisation of fungal groups associated with necrotrophy and plant tissue  
560 degradation. (3) No lineages of archaea were specifically associated with wheat roots.  
561 Conflicting data from DGGE and from 16S rRNA gene sequencing indicated that the currently  
562 available archaeal 16S rRNA gene databases are not sufficiently complete for this  
563 metabarcoding approach. In the future, longer read methods or metagenomics could be  
564 applied to better investigate archaeal community dynamics within the root microbiome. (4) We  
565 identified nine taxa within the rhizosphere utilising carbon from wheat root exudates, including  
566 aforementioned core taxa of *T. aestivum* var. Paragon, *Pseudomonadaceae* and  
567 *Burkholderiaceae*. There was no evidence that the most abundant endosphere bacterial family  
568 *Streptomycetaceae* was using plant exudates within the rhizosphere. Future <sup>13</sup>CO<sub>2</sub> SIP  
569 experiments should utilise a higher number of replicates to account for endosphere variation  
570 and to identify which families utilise host-derived carbon inside the root. Given the reduction  
571 in *Streptomycetaceae* abundance during senescence, future work should also consider  
572 exploring host derived nitrogen as a potential medium through which *T. aestivum* var. Paragon

573 might support endophytic bacteria. The present work has provided novel insights into the  
574 composition and variation within the wheat microbiome and how the community changes  
575 through developmental senescence. Greater understanding is needed of the role played by  
576 the five core taxa associated with *T. aestivum* var. Paragon, and the mechanisms by which  
577 they are able to colonise the root and are supported by the host. This knowledge may inform  
578 novel agricultural applications or more ecologically responsible management strategies for  
579 wheat.

580

## 581 **Methods**

### 582 Soil sampling and chemical analyses

583 Agricultural soil was sampled in April 2019 from the John Innes Centre (JIC) Church Farm  
584 cereal crop research station in Bawburgh (Norfolk, United Kingdom) (52°37'39.4"N  
585 1°10'42.2"E). The top 20cm of soil was removed prior to sampling. Levington F2 compost was  
586 obtained from the John Innes Centre. Soil was stored at 4°C and pre-homogenised prior to  
587 use. Chemical analysis was performed by the James Hutton Institute Soil Analysis Service  
588 (Aberdeen, UK) to measure soil pH, organic matter (%), and the phosphorus, potassium, and  
589 magnesium content (mg/kg) (Supplementary Table 3). To quantify inorganic nitrate and  
590 ammonium concentrations a KCl extraction was performed where 3g of each soil type  
591 suspended in 24ml of 1 M KCl in triplicate and incubated for 30 minutes with shaking at  
592 250rpm. To quantify ammonium concentration (g/kg) the colorimetric indophenol blue method  
593 was used [80]. For nitrate concentration (g/kg) vanadium (III) chloride reduction coupled to the  
594 colorimetric Griess reaction as previously described in Miranda *et al.* [81].

595

### 596 Wheat cultivation, sampling and DNA extraction

597 Paragon var. *Triticum aestivum* seeds were soaked for two minutes in 70% ethanol (v/v), 10  
598 minutes in 3% sodium hypochlorite (v/v) and washed 10 times with sterile water to sterilise the  
599 seed surface. Seeds were sown into pots of pre-homogenised Church farm agricultural soil,  
600 Levington F2 compost, or a 50:50 (v/v) mix of the two. Plants were propagated for 30 days at

601 21°C under a 12 h light/ 12 h dark photoperiod before endosphere, rhizosphere and bulk soil  
602 samples were analysed. To assess microbial community diversity in the field, Paragon var.  
603 *Triticum aestivum* plants were sampled during the stem elongation growth phase  
604 approximately 200 days after sowing, in July 2019. To assess microbial diversity after  
605 senescence, three Paragon var. *Triticum aestivum* plants were sampled immediately before  
606 harvest in August 2020 approximately 230 days after sowing. All field grown plants were  
607 sampled from the JIC Church Farm field studies site in Bawburgh (Norfolk, United Kingdom)  
608 (52°37'42.0"N 1°10'36.3"E) and were cultivated in the same field from which agricultural soil  
609 was sampled.

610

611 Microbial communities were analysed in the bulk soil, rhizosphere and endosphere for all  
612 plants. All three compartments were analysed from triplicate plants for each condition  
613 described (Church farm agricultural soil, Levington F2 compost, 50:50 vol/vol mix, and field-  
614 grown stem elongation or senescence). After a plant was removed, the potted soil associated  
615 with each plant was homogenised and a bulk soil sample was taken. For field-grown wheat  
616 bulk soil samples were taken from unplanted soil approximately 30cm away from the plant, in  
617 the same way as described for soil sampling. For all plants the phyllosphere was removed  
618 using a sterile scalpel and discarded. To analyse the rhizosphere and endosphere samples,  
619 loose soil was lightly shaken off of the roots, then roots were washed in phosphate buffer  
620 saline (PBS) (6.33g NaH<sub>2</sub>PO<sub>4</sub>.H<sub>2</sub>O, 16.5g Na<sub>2</sub>HPO<sub>4</sub>.H<sub>2</sub>O, 1L dH<sub>2</sub>O, 0.02% Silwett L-77 (v/v)).  
621 Pelleted material from this wash was analysed as the rhizosphere sample. To obtain the  
622 endosphere samples, remaining soil particles were washed off of the roots with PBS buffer.  
623 Then roots were soaked for 30 seconds in 70% ethanol (v/v), 5 minutes in 3% sodium  
624 hypochlorite (v/v) and washed 10 times with sterile water for surface sterilisation. To remove  
625 the rhizoplane roots were then sonicated for 20 minutes in a sonicating water bath [6]. After  
626 processing, all root, rhizosphere, and soil samples were snap frozen and stored at -80°C. The  
627 frozen root material was ground up in liquid nitrogen with a pestle and mortar. For all samples  
628 DNA was extracted using the FastDNA™ SPIN Kit for Soil (MP Biomedical) according to



629 manufacturer's protocol with minor modifications: incubation in DNA matrix buffer was  
630 performed for 12 minutes and elution carried out using 75µl DNase/Pyrogen-Free Water. All  
631 DNA samples were stored at -20°C. DNA quality and yields were assessed using a nanodrop  
632 and Qubit fluorimeter.

633

#### 634 <sup>13</sup>C CO<sub>2</sub> labelling of wheat for DNA SIP

635 Agricultural soil was sampled in July 2019, sampling method was as previously described.  
636 The soil was homogenized; any organic matter, or stones larger than ~3cm, were removed  
637 before soil was spread out to a depth of ~2cm and dried at 20°C overnight. Soil was added to  
638 pots and wetted before surface sterilized *T. aestivum* var. Paragon seeds were sown (surface  
639 sterilisation performed as described), three additional pots remained unplanted as controls for  
640 autotrophic CO<sub>2</sub> fixation by soil microorganisms. Plants were grown in unsealed gas tight  
641 4.25L PVC chambers under a 12 h light/ 12 h dark photoperiod at 21°C for 3 weeks. Then at  
642 the start of each photoperiod the chambers were purged with CO<sub>2</sub> free air (80% nitrogen, 20%  
643 oxygen, British Oxygen Company, Guilford, UK) and sealed before pulse CO<sub>2</sub> injection every  
644 hour. During each photoperiod 3 plants and 3 unplanted soil controls were injected with <sup>13</sup>C  
645 CO<sub>2</sub> (99% Cambridge isotopes, Massachusetts, USA) and 3 plants were injected with <sup>12</sup>C CO<sub>2</sub>.  
646 Headspace CO<sub>2</sub> was maintained at 800ppmv (~twice atmospheric CO<sub>2</sub>). Plant CO<sub>2</sub> uptake  
647 rates were determined every 4 days to ensure the volume of CO<sub>2</sub> added at each 1 h interval  
648 would maintain approximately 800ppmv. For this, headspace CO<sub>2</sub> concentrations were  
649 measured using gas chromatography every hour. Measurements were conducted using an  
650 Agilent 7890A gas chromatography instrument, with flame ionization detector, a Poropak Q  
651 (6ft x 1/8") HP plotQ column (30m x 0.530mm, 40µm film), a nickel catalyst, and a helium  
652 carrier gas. The instrument ran with the following settings: injector temperature 250°C,  
653 detector temperature 300°C, column temperature 115°C and oven temperature 50°C. The  
654 injection volume was 100µl and run time was 5mins (CO<sub>2</sub> retention time is 3.4 mins). A  
655 standard curve was used to calculate CO<sub>2</sub> ppmv from peak areas. Standards of known CO<sub>2</sub>  
656 concentration were prepared in nitrogen flushed 120ml serum vials. The volume of CO<sub>2</sub>



657 injected at each 1h interval to maintain 800ppmv CO<sub>2</sub> was calculated as follows: Vol CO<sub>2</sub> (ml)  
658 = (800 (ppmv) – headspace CO<sub>2</sub> after 1 hour (ppmv) / 1000) \* 4.25(L) . At the end of each  
659 photoperiod, tube lids were removed to prevent build-up of CO<sub>2</sub> during the dark period. At the  
660 start of the next 12 h, photoperiod tubes were flushed with CO<sub>2</sub> free air and headspace CO<sub>2</sub>  
661 was maintained at 800ppmv as described. After 14 days of labelling for all plants bulk soil,  
662 rhizosphere, and endosphere compartments were sampled as described previously and snap-  
663 frozen prior to DNA extraction as described previously.

664

#### 665 Density gradient ultracentrifugation and fractionation for DNA SIP

666 Density gradient ultracentrifugation was used to separate <sup>13</sup>C labelled DNA from <sup>12</sup>C DNA as  
667 previously described by Neufeld and colleagues [57]. Briefly, for each sample 700ng of DNA  
668 was mixed with a 7.163 M CsCl solution and gradient buffer (0.1M Tris-HCl pH8, 0.1M  
669 KCl, 1mM EDTA) to a final measured buoyant density of 1.725 g/ml<sup>-1</sup>. Buoyant density was  
670 determined via the refractive index using a refractometer (Reichert Analytical Instruments, NY,  
671 USA). Samples were loaded into polyallomer quick seal centrifuge tubes (Beckman Coulter)  
672 and heat-sealed. Tubes were placed into a Vti 65.2 rotor (Beckman-Coulter) and centrifuged  
673 for 62 hours at 44,100 rpm (~177,000gav) and 20°C under a vacuum. Samples were  
674 fractionated by piercing the bottom of the ultracentrifuge tube with a 0.6 mm sterile needle and  
675 dH<sub>2</sub>O was pumped into the centrifuge tube at a rate of 450µl per minute, displacing the  
676 gradient into 1.5ml microcentrifuge tubes. Fractions were collected until the water had fully  
677 displaced the gradient solution; this resulted in twelve 450µl fractions. The DNA was  
678 precipitated from fractions by adding 4µl of Co-precipitant Pink Linear Polyacrylamide (Bioline)  
679 and 2 volumes of PEG-NaCl solution (30% w/v polyethylene glycol 6000, 1.6M NaCl) to each  
680 fraction, followed by an overnight incubation at 4°C. Fractions were then centrifuged at  
681 21,130g for 30 minutes and the supernatant was discarded. The DNA pellet was washed in  
682 500µl 70% EtOH and centrifuged at 21,130 g for 10 minutes. The resulting pellet was air-dried  
683 and resuspended in 30µl sterile dH<sub>2</sub>O. Fractions were then stored at -20°C. Fractions were  
684 pooled prior to sequencing (supplementary table 4), sequencing was performed as described

685 in the DNA sequencing and analysis section, except that peptide nucleic acid (PNA) blockers  
686 were used to prevent amplification of chloroplast and mitochondrial 16S rRNA genes.

687

#### 688 DNA sequencing and analysis

689 All 16S rRNA genes were amplified using primers specific to the archaeal (A0109F/A1000R)  
690 or bacterial (PRK341F/MPRK806R) gene (Supplementary Table 6). The fungal 18S ITS2  
691 region was amplified using primers specifically targeting fungi (fITS7Fw/ITS4Rev\_2) to avoid  
692 *Triticum aestivum* ITS2 amplification (Supplementary Table 6). No fungal ITS2 amplicon could  
693 be obtained from the endosphere of Levington F2 compost plants. PCR conditions are  
694 indicated in Supplementary Table 7. Purified PCR products were sent for paired-end  
695 sequencing using an Illumina MiSeq platform at Mr DNA (Molecular Research LP,  
696 Shallowater, Texas, USA). The bacterial 16S rRNA gene was sequenced using the  
697 PRK341F/MPRK806R primers (465bp). The archaeal 16S rRNA gene was sequenced using  
698 the A0349F/A0519R primers (170bp). The fungal ITS2 region was sequenced with the  
699 fITS7Fw/ITS4Rev\_2 primers (350bp). See Supplementary Table 6 for primer sequences.  
700 Upon receipt, all sequencing reads were further processed using the software package  
701 quantitative insights into microbial ecology 2 (Qiime2 [82]) version 2019.7. Paired-end  
702 sequencing reads were demultiplexed and then quality filtered and denoised using the DADA2  
703 plugin version 1.14 [83]. Reads were trimmed to remove the first 17-20 base pairs (primer  
704 dependent, see Supplementary Table 8) and truncated to 150-230 base pairs to remove low  
705 quality base calls (dependent on read quality and amplicon length, see Supplementary Table  
706 8). Chimeras were removed using the consensus method and default settings were used for  
707 all other analyses. For taxonomic assignments bayesian bacterial and archaeal 16S sequence  
708 classifiers were trained against the SILVA [84] database version 128 using a 97% similarity  
709 cut off. For the fungal ITS2 reads, the bayesian sequence classifier was trained against the  
710 UNITE [85] database version 8.0 using a 97% similarity cut-off. Taxonomy-based filtering was  
711 performed to remove contaminating mitochondrial, chloroplast and *Triticum* sequences

712 (Supplementary Table 9), remaining sequences were used for all further analyses. Taxonomy-  
713 based filtering was not required for the fungal dataset.

714

715 Statistical analysis was performed using *R* version 3.6.2 [86]. The package *vegan* version 2.5-  
716 7 [87] was used to calculate Bray Curtis dissimilarities and conduct similarity percentages  
717 breakdown analysis (SIMPER [88]). Permutational Multivariate Analysis of Variance  
718 (PERMANOVA) analyses were conducted using Bray Curtis dissimilarity matrices and the  
719 *adonis* function in *vegan*. Bray Curtis dissimilarities were also used for principle coordinate  
720 analysis (PCoA) which was performed using the packages *phyloseq* version 1.3 [89] and *plyr*.  
721 Differential abundance analysis was performed using DESeq2 in the package *microbiomeSeq*  
722 version 0.1 [90]. Given the low number of reads which remained in some samples after  
723 taxonomy-based filtering (Table 9), a base mean cut off of 200 for the field and pot  
724 metabarcoding experiments, or of 400 for the stable isotope probing experiment, was applied  
725 to the DESeq2 output to eliminate possible false positives resulting from low sequencing  
726 depth. If a taxon had a base mean > 200 and a significant p-value in one or more comparison,  
727 data for that taxon was plotted in Figure 3 for all comparisons. For details see Supplementary  
728 Tables 4, 10-16.

729

### 730 Real-time quantitative PCR

731 The abundance of bacterial or archaeal 16S rRNA genes and of fungal 18S rRNA genes was  
732 determined by qPCR amplification of these genes from DNA extracts. Bacterial 16S rRNA  
733 abundance was quantified using bacteria-specific primers Com1F/769r, as previously  
734 described [91]. Archaeal 16S rRNA gene abundance was quantified using the archaeal  
735 specific A771f/A957r primers, as previously described [92]. Fungi-specific primers, as  
736 previously described [93], FR1F/FF390R were used to quantify 18S rRNA gene abundance  
737 and examine <sup>13</sup>C labelling of the fungal community for the SIP fractions. Primer sequences  
738 are presented in Supplementary Table 6. The qPCR was performed using the Applied  
739 Biosystems QuantStudio 1 Real-Time PCR System (Applied Biosystems, Warrington, UK)

740 with the New England Biolabs SYBR Green Luna® Universal qPCR Master Mix (New England  
741 Biolabs, Hitchin, UK). PCR mixtures and cycling conditions are described in Supplementary  
742 Table 7. Bacterial, fungal and archaeal qPCR standards were generated using a set of primers  
743 enabling amplification of the full length bacterial or archaeal 16S rRNA gene or fungal 18S  
744 rRNA gene, cloned into the Promega pGEM®-T Easy Vector system, and the correct  
745 sequence was validated by Sanger sequencing (Supplementary Table 6). After purification,  
746 the standard was diluted from  $2 \times 10^7$  to  $2 \times 10^0$  copies/ $\mu$ l in duplicate and ran alongside all qPCR  
747 assays. Ct values from standard dilutions were plotted as a standard curve and used to  
748 calculate 16S/18S rRNA gene copies/50 ng DNA extract. Amplification efficiencies ranged  
749 from 90.9% to 107% with  $R^2 > 0.98$  for all standard curve regressions. All test samples were  
750 normalised to 50ng of template DNA per reaction and ran in biological triplicate. PCR products  
751 were all analysed by both melt curves and agarose gel electrophoresis which confirmed  
752 amplification of only one product of the expected size. For statistical comparison of the  
753 average 16S rRNA or 18S rRNA gene copy number between samples ANOVA and linear  
754 models, followed by Tukey post-hoc was run in *R* [86].

755

#### 756 Denaturing gradient gel electrophoresis (DGGE)

757 DGGE was performed separately on the bacterial and archaeal 16S rRNA genes to screen  
758 SIP fractions for a change in the community in the heavy compared to the light fractions, and  
759 between the  $^{13}\text{CO}_2$  labelled heavy fractions and those of the  $^{12}\text{CO}_2$  control plants. A nested  
760 PCR approach was taken to amplify the archaeal 16S rRNA gene, the first round used primers  
761 A109F/A1000R and the second introduced a 5' GC clamp using A771F-GC/A975R  
762 (Supplementary Table 6). The same method was used to screen for a shift in the archaeal  
763 community across root compartments. One round of PCR was used for bacterial DGGE using  
764 the primers PRK341F-GC/518R to introduce a 5' GC clamp, and for archaeal *amoA* DGGE  
765 using CrenamoA23f/A616r (Supplementary Table 6). PCR conditions are indicated in  
766 Supplementary Table 7. An 8% polyacrylamide gel was made with a denaturing gradient of  
767 40-80% (2.8M urea / 16% (vol/vol) formamide, to 5.6M urea / 32% (vol/vol) formamide), and

768 a 6% acrylamide stacking gel with 0% denaturant. 2-8µl of PCR product was loaded per well  
769 for each sample and the gel was loaded into an electrophoresis tank filled with 1x Tris acetate  
770 EDTA (TAE) buffer (242g Tris base, 57.1ml acetic acid, 100ml 0.5M EDTA pH 8.0).  
771 Electrophoresis ran at 0.2 amps, 75 volts and 60°C for 16 hours. After washing, gels were  
772 stained in the dark using 4µl of SYBR gold nucleic acid gel stain (Invitrogen™) in 400ml 1x  
773 TAE buffer. After one hour, gels were washed twice before imaging using a Bio-Rad Gel Doc  
774 XR imager.

775

## 776 **Declarations**

### 777 **Ethics approval and consent to participate**

778 Not Applicable.

### 779 **Consent for publication**

780 Not Applicable.

### 781 **Availability of data and material**

782 The datasets generated during and/or analysed during the current study are available in the  
783 European Nucleotide Archive. Accession number PRJEB42686  
784 (<https://www.ebi.ac.uk/ena/browser/view/PRJEB42686>).

### 785 **Competing interests**

786 The authors declare that they have no competing interests.

### 787 **Funding**

788 This work was supported by the Natural Environment Research Council EnvEast/ARIES  
789 doctoral training partnership (NE/L002582/1), the Norwich Research Park BBSRC Doctoral  
790 Training Program (BB/M011216/1), a Royal Society Dorothy Hodgkin Research Fellowship  
791 (DH150187), by a European Research Council (ERC) Starting Grant (UNITY 852993), and by  
792 the Earth and Life Systems Alliance (ELSA) at the University of East Anglia.

### 793 **Authors' contributions**

794 SMMP, JCM, LLM and MIH designed the metabarcoding experiments and all authors  
795 contributed to the design of the stable isotope probing (SIP) experiment. SMMP performed all  
796 the metabarcoding and qPCR experiments, and SMMP and SFW performed all subsequent  
797 bioinformatic and statistical analysis. SP assessed the fungal and archaeal communities for  
798 the SIP experiment. SMMP and JTN performed the labelling, and the density gradient  
799 ultracentrifugation and fractionation for the SIP experiment. JTN performed bacterial  
800 community denaturing gradient gel electrophoresis, metabarcoding, and all subsequent  
801 bioinformatic and statistical analysis for the SIP experiment. Field sampling was performed by

802 SMMP, JTN, and MIH. All authors contributed to the development of and approved the final  
803 manuscript.

#### 804 **Acknowledgements**

805 S.M.M.P. and S.F.W. were funded by Natural Environment Research Council (NERC) PhD  
806 studentships (NERC Doctoral Training Programme grant NE/L002582/1). J.T.N. was funded  
807 by a Biotechnology and Biological Sciences Research Council (BBSRC) PhD studentship  
808 (BBSRC Doctoral Training Program grant BB/M011216/1). L.L.M is supported by a Royal  
809 Society Dorothy Hodgkin Research Fellowship (DH150187) and by a European Research  
810 Council (ERC) Starting Grant (UNITY 852993). DNA sequencing was performed at Molecular  
811 Research Ltd and we thank Dr Scot E. Dowd for this service. Seed materials were acquired  
812 from the John Innes Centre Germplasm Resource Unit (JIC GRU) and we thank the whole  
813 GRU team for their invaluable support with this work. Field studies were performed at the John  
814 Innes Centre Field Studies Site in Bawburgh, and we thank the Simon Orford for invaluable  
815 help with field sampling, and the entire John Innes Centre Cereal Crop Research team for all  
816 their support. Computational analysis was performed using the High-Performance Computing  
817 Cluster supported by the Research and Specialist Computing Support service at the University  
818 of East Anglia and we would like to thank the entire team for their support with this work. We  
819 would like to thank Dr Richard Oliver for valuable conversations on fungal taxonomy and  
820 fungal community dynamics during senescence.

821 **Figures**

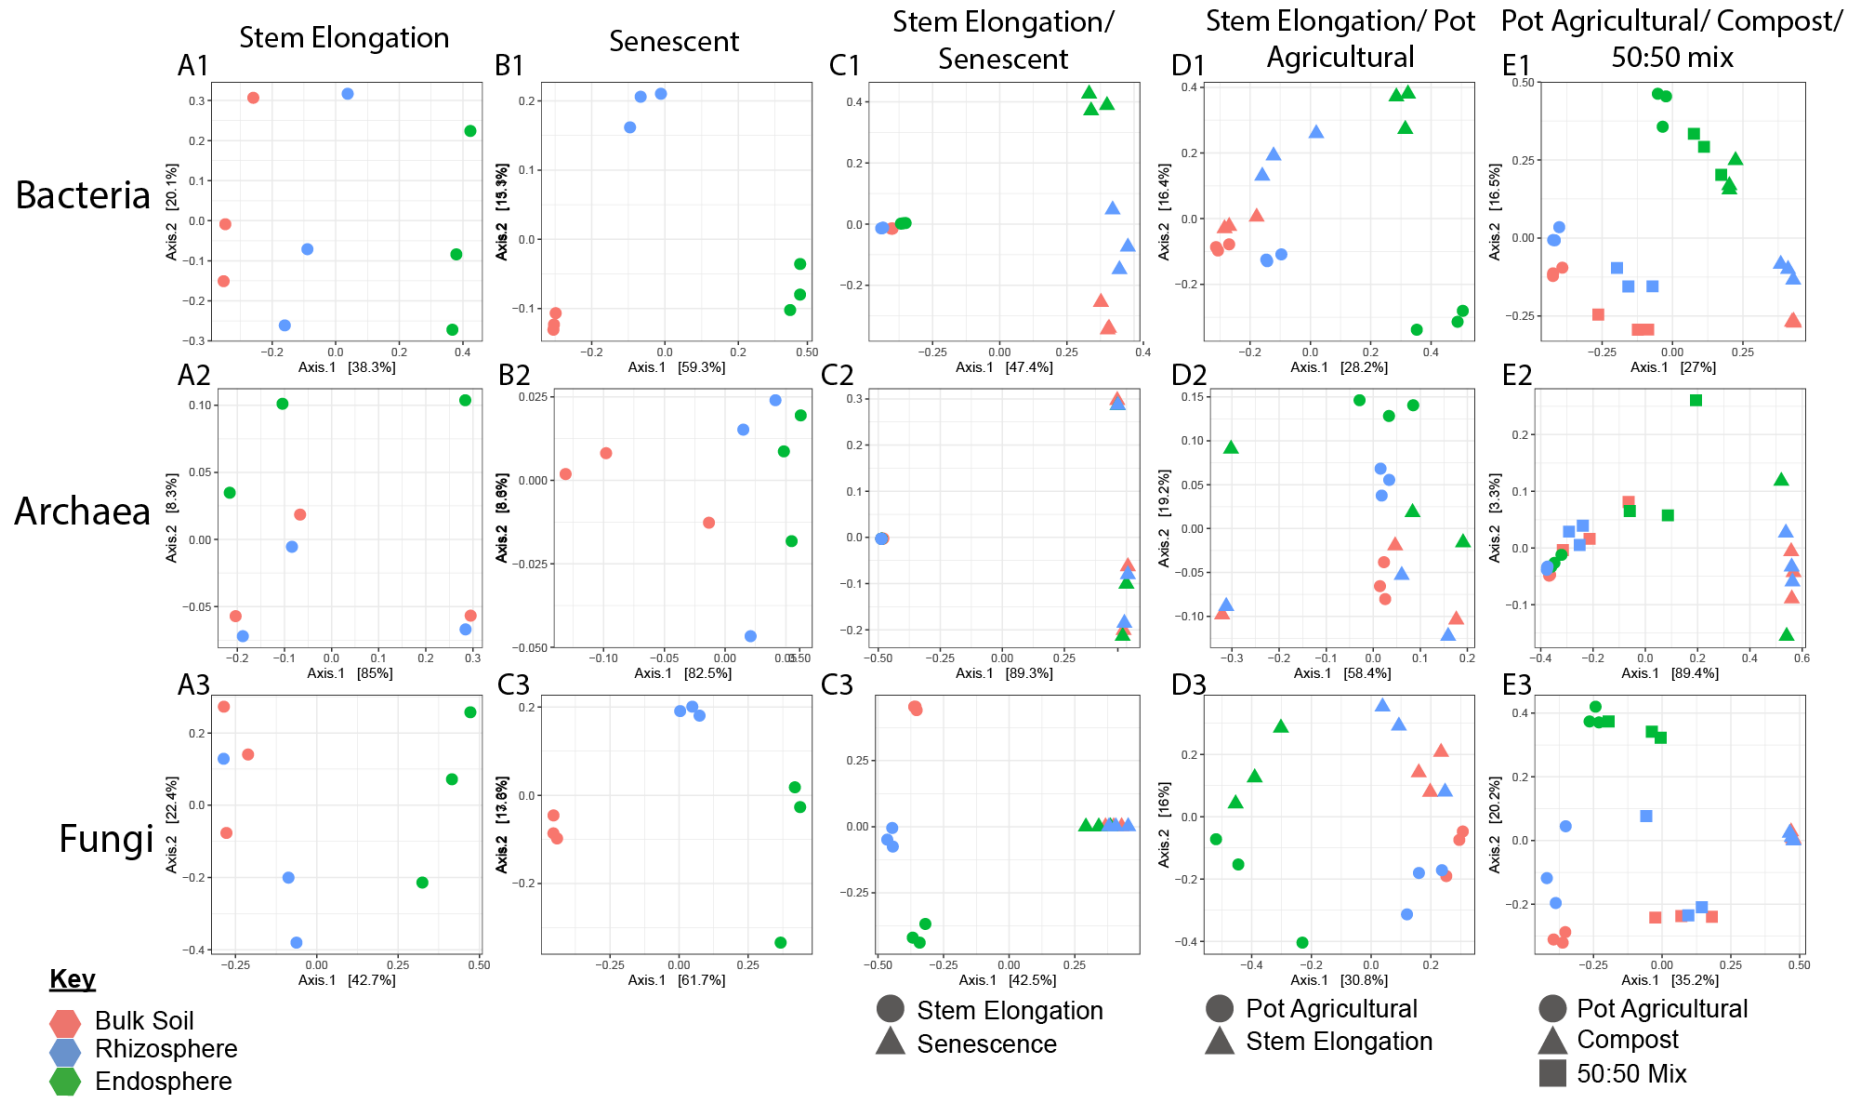

822 **Figure 1.** Principal Coordinates Analysis (PCoA) performed on Bray Curtis dissimilarities between samples of the bacterial, archaeal and fungal  
823 communities associated with wheat roots. Colours indicate root compartment; green = endosphere, blue = rhizosphere and pink = bulk soil. N=3  
824 replicate plants per treatment. A1, A2, A3 show PCoA for Plants cultivated at the Church Farm field studies site at the stem elongation growth  
825 phase. B1, B2 and B3 show data from plants after senescence. C1, C2 and C3 show comparisons between stem elongation growth phase  
826 (circles) and senescent plants (triangles). D1, D2 and D3 show comparisons between 4-week-old laboratory cultivated plants (circles) and stem  
827 elongation growth phase field cultivated plants (triangles). E1, E2 and E3 show PCoA comparing communities associated with plants cultivated  
828 under laboratory conditions in agricultural soil (circles), Levington F2 compost (triangles) or a 50:50 mix of the two (squares).





34

842 column, respectively). N=3 replicate plants per treatment. Bars represent  $\pm$  standard error of  
 843 the mean. Letters indicate a statistically significant difference between the two samples  
 844 (Tukeys HSD,  $p < 0.05$  for all).

845

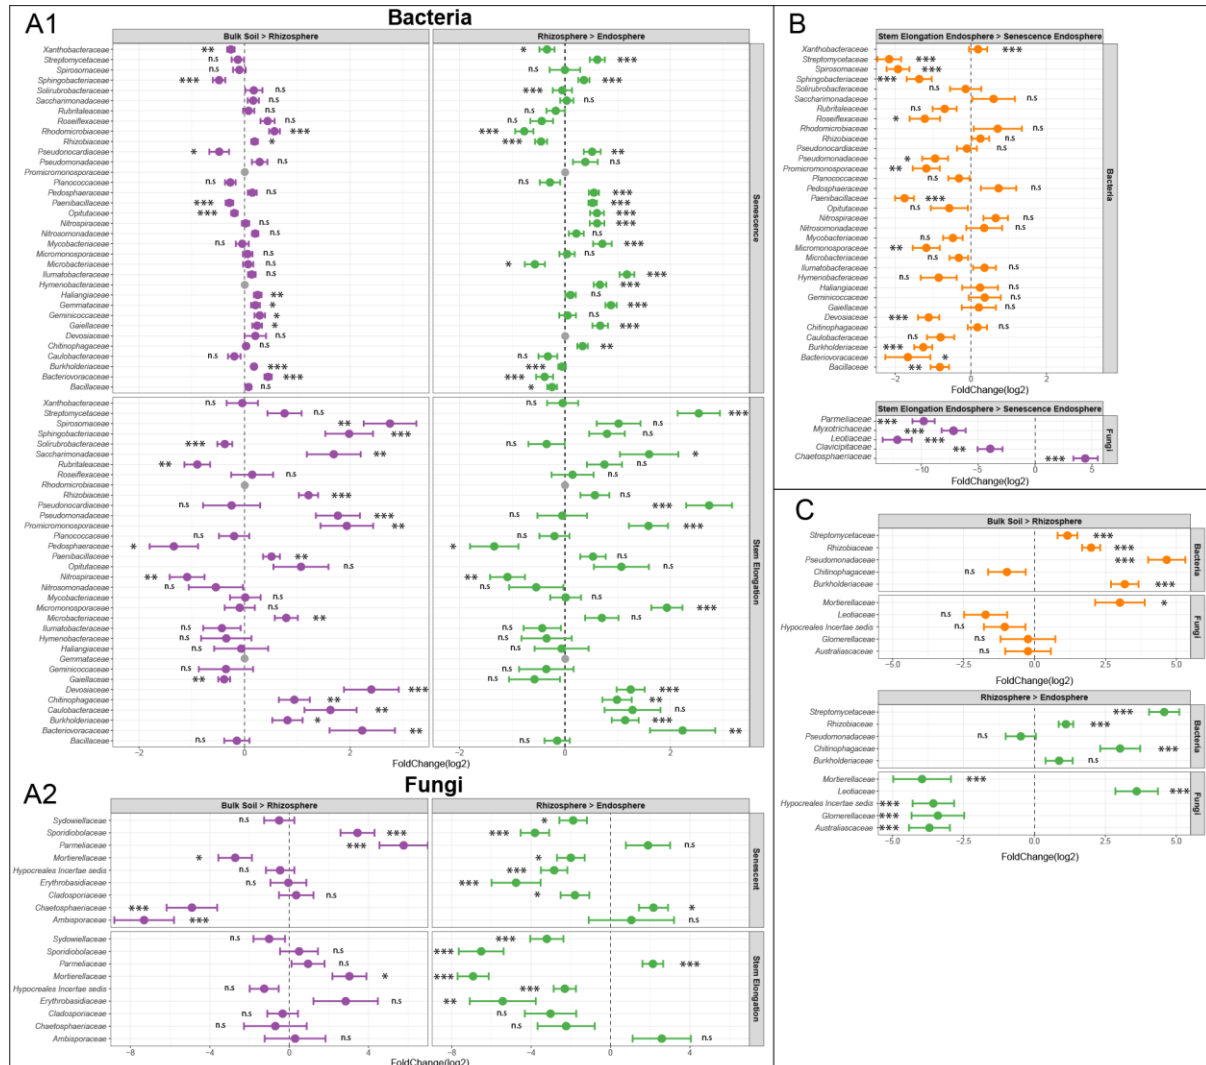

846 **Figure 3.** Results of differential abundance analysis. Dots show the log<sub>2</sub> fold change of  
 847 different bacterial or fungal families and error bars show  $\pm$  log fold change standard error.  
 848 Results are from N=3 replicate plants per treatment. Shown are: **A** Bacterial and fungal  
 849 families that were differentially abundant between the bulk soil the rhizosphere, and between  
 850 the rhizosphere and the endosphere for stem elongation and senesced plants. **B** Bacterial and  
 851 fungal taxa that were differentially abundant between the endosphere of stem elongation  
 852 growth phase plants and senesced plants. **C** Bacterial and fungal taxa that were differentially  
 853 abundant regardless of soil type for pot grown wheat. Analysis was performed using DESeq2.  
 854 If a family had a base mean > 200 and a significant p-value (significance cut-off  $p < 0.05$ ) in  
 855 one or more comparison, data for that taxon was plotted for all comparisons, \* indicates  $p <$   
 856 0.05, \*\* indicates  $p < 0.01$ , \*\*\* indicates  $p < 0.001$ , and n.s indicates  $p > 0.05$ . Data for all pot-

857 grown plants were pooled and taxa which still showed significant fold change across  
858 compartments were included. For all complete statistical outputs see Supplementary Tables  
859 10-16.  
860

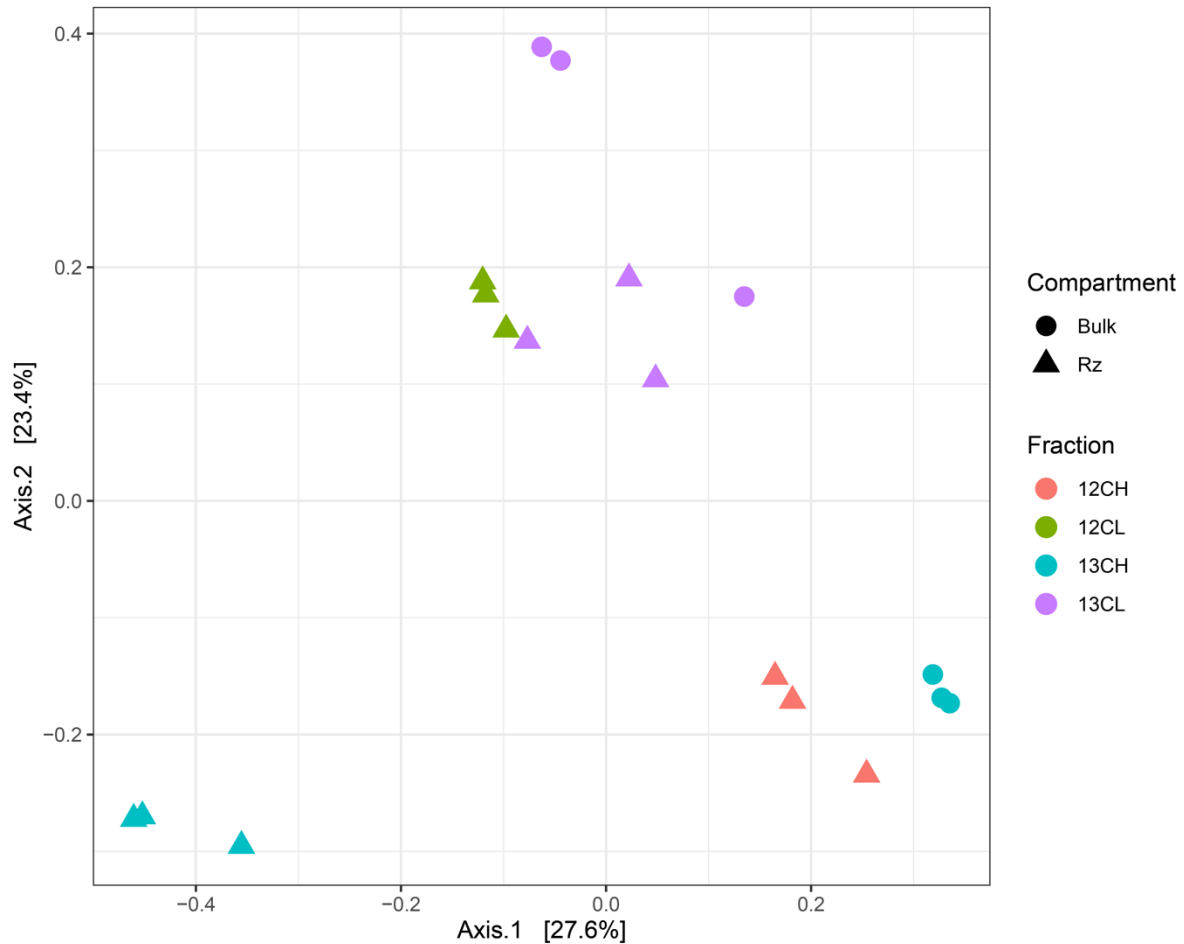

861 **Figure 4.** Principle coordinates analysis (PCoA) of Bray-Curtis dissimilarity between bacterial  
862 families present in the heavy and light fractions of rhizosphere and bulk soil <sup>13</sup>C labelled and  
863 <sup>12</sup>C unlabelled treatments (N=3 replicate plants per CO<sub>2</sub> treatment). Rhizosphere communities  
864 were shown to vary significantly between labelled or unlabelled fractions (PERMANOVA:  
865 permutations=999, R<sup>2</sup>= 0.59, *p* < 0.001).

866

867

868

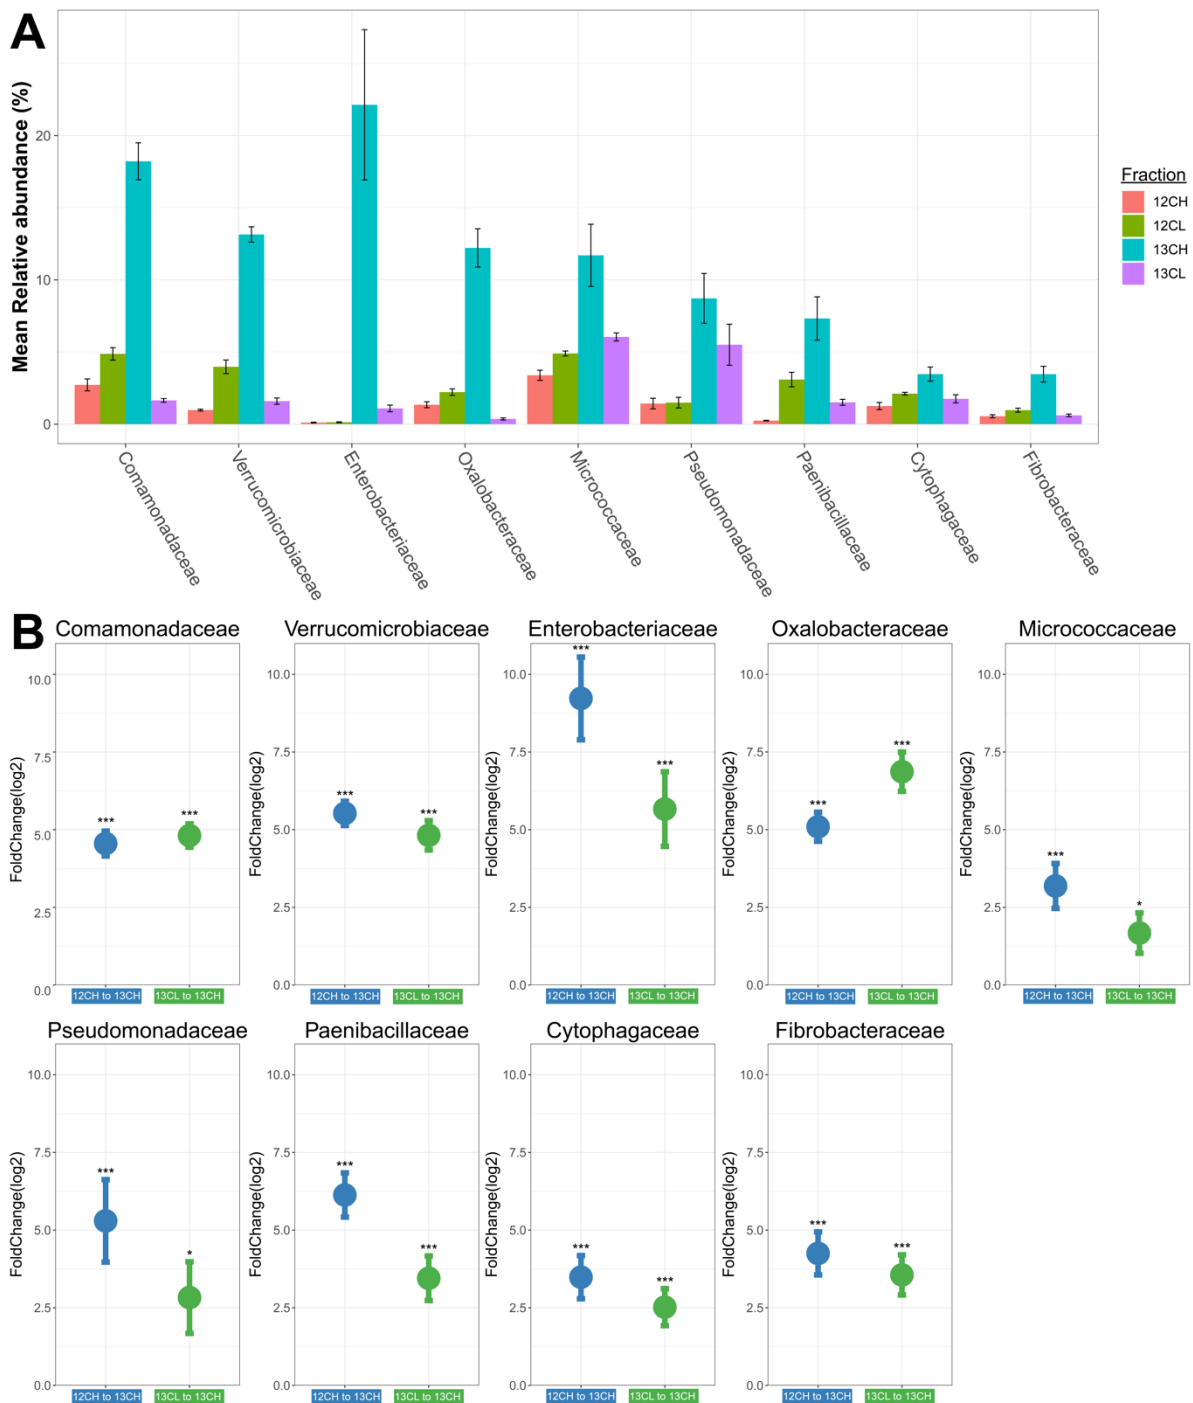

869 **Figure 5. A** Mean relative abundance of each bacterial family in the rhizosphere of plants  
 870 incubated with  $^{12}\text{CO}_2$  or  $^{13}\text{CO}_2$ . N=3 replicate plants per treatment. Bars represent  $\pm$  standard  
 871 errors of the mean. **B** The results of differential abundance analysis for bacterial families in  
 872 the rhizosphere; points show the log2 fold change of different bacterial families between the  
 873  $^{12}\text{CO}_2$  heavy and the  $^{13}\text{CO}_2$  heavy fraction (blue) or between the  $^{13}\text{CO}_2$  light and the  $^{13}\text{CO}_2$   
 874 heavy fraction (green) (N=3). Log2-fold change standard errors of triplicate plants is shown.  
 875 \*\*\* represents taxa with a significant log2fold change ( $p < 0.001$ ) For the full statistical output  
 876 see Supplementary Table 5.

877 **References**

- 878 [1] Borrill P, Harrington SA, Uauy C. Applying the latest advances in genomics and phenomics for  
879 trait discovery in polyploid wheat. *Plant J* 2018;tpj.14150. <https://doi.org/10.1111/tpj.14150>.
- 880 [2] Loick N, Dixon ER, Abalos D, Vallejo A, Matthews GP, McGeough KL, *et al.* Denitrification as a  
881 source of nitric oxide emissions from incubated soil cores from a UK grassland soil. *Soil Biology*  
882 *and Biochemistry* 2016;95:1–7. <https://doi.org/10.1016/j.soilbio.2015.12.009>.
- 883 [3] Tilman D, Balzer C, Hill J, Befort BL. Global food demand and the sustainable intensification of  
884 agriculture. *Proceedings of the National Academy of Sciences* 2011;108:20260–4.  
885 <https://doi.org/10.1073/pnas.1116437108>.
- 886 [4] Jog R, Pandya M, Nareshkumar G, Rajkumar S. Mechanism of phosphate solubilization and  
887 antifungal activity of *Streptomyces* spp. isolated from wheat roots and rhizosphere and their  
888 application in improving plant growth. *Microbiology* 2014;160:778–88.  
889 <https://doi.org/10.1099/mic.0.074146-0>.
- 890 [5] Palaniyandi SA, Damodharan K, Yang SH, Suh JW. *Streptomyces* sp. strain PGPA39 alleviates salt  
891 stress and promotes growth of ‘Micro Tom’ tomato plants. *J Appl Microbiol* 2014;117:766–73.  
892 <https://doi.org/10.1111/jam.12563>.
- 893 [6] Bulgarelli D, Rott M, Schlaeppi K, Ver Loren van Themaat E, Ahmadinejad N, Assenza F, *et al.*  
894 Revealing structure and assembly cues for *Arabidopsis* root-inhabiting bacterial microbiota.  
895 *Nature* 2012;488:91–5. <https://doi.org/10.1038/nature11336>.
- 896 [7] Pascale A, Proietti S, Pantelides IS, Stringlis IA. Modulation of the root microbiome by plant  
897 molecules: the basis for targeted disease suppression and plant growth promotion. *Front Plant*  
898 *Sci* 2020;10:1741. <https://doi.org/10.3389/fpls.2019.01741>.
- 899 [8] Iannucci A, Fragasso M, Beleggia R, Nigro F, Papa R. Evolution of the crop rhizosphere: impact  
900 of domestication on root exudates in tetraploid wheat (*Triticum turgidum* L.). *Front Plant Sci*  
901 2017;8:2124. <https://doi.org/10.3389/fpls.2017.02124>.
- 902 [9] Haichar F el Z, Heulin T, Guyonnet JP, Achouak W. Stable isotope probing of carbon flow in the  
903 plant holobiont. *Current Opinion in Biotechnology* 2016;41:9–13.  
904 <https://doi.org/10.1016/j.copbio.2016.02.023>.
- 905 [10] Sasse J, Martinoia E, Northen T. Feed your friends: do plant exudates shape the root  
906 microbiome? *Trends in Plant Science* 2018;23:25–41.  
907 <https://doi.org/10.1016/j.tplants.2017.09.003>.
- 908 [11] Bulgarelli D, Garrido-Oter R, Münch PC, Weiman A, Dröge J, Pan Y, *et al.* Structure and function  
909 of the bacterial root microbiota in wild and domesticated barley. *Cell Host & Microbe*  
910 2015;17:392–403. <https://doi.org/10.1016/j.chom.2015.01.011>.
- 911 [12] Bais HP, Weir TL, Perry LG, Gilroy S, Vivanco JM. The role of root exudates in rhizosphere  
912 interactions with plants and other organisms. *Annu Rev Plant Biol* 2006;57:233–66.  
913 <https://doi.org/10.1146/annurev.arplant.57.032905.105159>.
- 914 [13] Paul Chowdhury S, Babin D, Sandmann M, Jacquiod S, Sommermann L, Sørensen SJ, *et al.*  
915 Effect of long-term organic and mineral fertilization strategies on rhizosphere microbiota  
916 assemblage and performance of lettuce. *Environ Microbiol* 2019;21:2426–39.  
917 <https://doi.org/10.1111/1462-2920.14631>.
- 918 [14] Bragina A, Berg C, Berg G. The core microbiome bonds the Alpine bog vegetation to a  
919 transkingdom metacommunity. *Mol Ecol* 2015;24:4795–807.  
920 <https://doi.org/10.1111/mec.13342>.
- 921 [15] Shade A, Handelsman J. Beyond the Venn diagram: the hunt for a core microbiome: The hunt  
922 for a core microbiome. *Environmental Microbiology* 2012;14:4–12.  
923 <https://doi.org/10.1111/j.1462-2920.2011.02585.x>.
- 924 [16] Lundberg DS, Lebeis SL, Paredes SH, Yourstone S, Gehring J, Malfatti S, *et al.* Defining the core  
925 *Arabidopsis thaliana* root microbiome. *Nature* 2012;488:86–90.  
926 <https://doi.org/10.1038/nature11237>.

- 927 [17] Tian B, Zhang C, Ye Y, Wen J, Wu Y, Wang H, *et al.* Beneficial traits of bacterial endophytes  
928 belonging to the core communities of the tomato root microbiome. *Agriculture, Ecosystems &*  
929 *Environment* 2017;247:149–56. <https://doi.org/10.1016/j.agee.2017.06.041>.
- 930 [18] Yeoh YK, Paungfoo-Lonhienne C, Dennis PG, Robinson N, Ragan MA, Schmidt S, *et al.* The core  
931 root microbiome of sugarcane cultivated under varying nitrogen fertilizer application: N  
932 fertilizer and sugarcane root microbiota. *Environ Microbiol* 2016;18:1338–51.  
933 <https://doi.org/10.1111/1462-2920.12925>.
- 934 [19] Yeoh YK, Dennis PG, Paungfoo-Lonhienne C, Weber L, Brackin R, Ragan MA, *et al.* Evolutionary  
935 conservation of a core root microbiome across plant phyla along a tropical soil  
936 chronosequence. *Nat Commun* 2017;8:215. <https://doi.org/10.1038/s41467-017-00262-8>.
- 937 [20] Berg G, Smalla K. Plant species and soil type cooperatively shape the structure and function of  
938 microbial communities in the rhizosphere: plant species, soil type and rhizosphere  
939 communities. *FEMS Microbiology Ecology* 2009;68:1–13. [https://doi.org/10.1111/j.1574-](https://doi.org/10.1111/j.1574-6941.2009.00654.x)  
940 [6941.2009.00654.x](https://doi.org/10.1111/j.1574-6941.2009.00654.x).
- 941 [21] Rascovan N, Carbonetto B, Perrig D, Díaz M, Canciani W, Abalo M, *et al.* Integrated analysis of  
942 root microbiomes of soybean and wheat from agricultural fields. *Sci Rep* 2016;6:28084.  
943 <https://doi.org/10.1038/srep28084>.
- 944 [22] Houlden A, Timms-Wilson TM, Day MJ, Bailey MJ. Influence of plant developmental stage on  
945 microbial community structure and activity in the rhizosphere of three field crops: Plant and  
946 growth stage effects on microbial populations. *FEMS Microbiology Ecology* 2008;65:193–201.  
947 <https://doi.org/10.1111/j.1574-6941.2008.00535.x>.
- 948 [23] Chen S, Waghmode TR, Sun R, Kuramae EE, Hu C, Liu B. Root-associated microbiomes of wheat  
949 under the combined effect of plant development and nitrogen fertilization. *Microbiome*  
950 2019;7:136. <https://doi.org/10.1186/s40168-019-0750-2>.
- 951 [24] Tkacz A, Pini F, Turner TR, Bestion E, Simmonds J, Howell P, *et al.* Agricultural selection of  
952 wheat has been shaped by plant-microbe interactions. *Front Microbiol* 2020;11:132.  
953 <https://doi.org/10.3389/fmicb.2020.00132>.
- 954 [25] Granzow S, Kaiser K, Wemheuer B, Pfeiffer B, Daniel R, Vidal S, *et al.* The effects of cropping  
955 regimes on fungal and bacterial communities of wheat and faba bean in a greenhouse pot  
956 experiment differ between plant species and compartment. *Front Microbiol* 2017;8:902.  
957 <https://doi.org/10.3389/fmicb.2017.00902>.
- 958 [26] Mavrodi DV, Mavrodi OV, Elbourne LDH, Tetu S, Bonsall RF, Parejko J, *et al.* Long-term  
959 irrigation affects the dynamics and activity of the wheat rhizosphere microbiome. *Front Plant*  
960 *Sci* 2018;9:345. <https://doi.org/10.3389/fpls.2018.00345>.
- 961 [27] Gdanetz K, Trail F. The wheat microbiome under four management strategies, and potential for  
962 endophytes in disease protection. *Phytobiomes* 2017;1:158–68.  
963 <https://doi.org/10.1094/PBIOMES-05-17-0023-R>.
- 964 [28] Kuźniar A, Włodarczyk K, Grządziel J, Goraj W, Gałązka A, Wolińska A. Culture-independent  
965 analysis of an endophytic core microbiome in two species of wheat: *Triticum aestivum* L. (cv.  
966 ‘Hondia’) and the first report of microbiota in *Triticum spelta* L. (cv. ‘Rokosz’). *Systematic and*  
967 *Applied Microbiology* 2020;43:126025. <https://doi.org/10.1016/j.syapm.2019.126025>.
- 968 [29] Schlatter DC, Yin C, Hulbert S, Paulitz TC. Core rhizosphere microbiomes of dryland wheat are  
969 influenced by location and land use history. *Appl Environ Microbiol* 2019;86:e02135-19,  
970 [/aem/86/5/AEM.02135-19.atom](https://doi.org/10.1128/AEM.02135-19). <https://doi.org/10.1128/AEM.02135-19>.
- 971 [30] Turner TR, Ramakrishnan K, Walshaw J, Heavens D, Alston M, Swarbreck D, *et al.* Comparative  
972 metatranscriptomics reveals kingdom level changes in the rhizosphere microbiome of plants.  
973 *ISME J* 2013;7:2248–58. <https://doi.org/10.1038/ismej.2013.119>.
- 974 [31] J. G. S. S. Taxonomic diversity of bacteria associated with the roots of modern, recent and  
975 ancient wheat cultivars. *Biology and Fertility of Soils* 2001;33:410–5.  
976 <https://doi.org/10.1007/s003740100343>.



- 977 [32] Mahoney AK, Yin C, Hulbert SH. Community structure, species variation, and potential  
978 functions of rhizosphere-associated bacteria of different winter wheat (*Triticum aestivum*)  
979 cultivars. *Front Plant Sci* 2017;8. <https://doi.org/10.3389/fpls.2017.00132>.
- 980 [33] Baker GC, Smith JJ, Cowan DA. Review and re-analysis of domain-specific 16S primers. *Journal*  
981 *of Microbiological Methods* 2003;55:541–55. <https://doi.org/10.1016/j.mimet.2003.08.009>.
- 982 [34] Song GC, Im H, Jung J, Lee S, Jung M, Rhee S, *et al.* Plant growth-promoting archaea trigger  
983 induced systemic resistance in *Arabidopsis thaliana* against *Pectobacterium carotovorum* and  
984 *Pseudomonas syringae*. *Environ Microbiol* 2019;21:940–8. [https://doi.org/10.1111/1462-](https://doi.org/10.1111/1462-2920.14486)  
985 [2920.14486](https://doi.org/10.1111/1462-2920.14486).
- 986 [35] Distelfeld A, Avni R, Fischer AM. Senescence, nutrient remobilization, and yield in wheat and  
987 barley. *Journal of Experimental Botany* 2014;65:3783–98. <https://doi.org/10.1093/jxb/ert477>.
- 988 [36] Guiboileau A, Sormani R, Meyer C, Masclaux-Daubresse C. Senescence and death of plant  
989 organs: Nutrient recycling and developmental regulation. *Comptes Rendus Biologies*  
990 2010;333:382–91. <https://doi.org/10.1016/j.crv.2010.01.016>.
- 991 [37] Häffner E, Konietzki S, Diederichsen E. Keeping control: the role of senescence and  
992 development in plant pathogenesis and defense. *Plants* 2015;4:449–88.  
993 <https://doi.org/10.3390/plants4030449>.
- 994 [38] Zhalnina K, Louie KB, Hao Z, Mansoori N, da Rocha UN, Shi S, *et al.* Dynamic root exudate  
995 chemistry and microbial substrate preferences drive patterns in rhizosphere microbial  
996 community assembly. *Nat Microbiol* 2018;3:470–80. [https://doi.org/10.1038/s41564-018-](https://doi.org/10.1038/s41564-018-0129-3)  
997 [0129-3](https://doi.org/10.1038/s41564-018-0129-3).
- 998 [39] Dumont MG, Murrell JC. Stable isotope probing — linking microbial identity to function. *Nat*  
999 *Rev Microbiol* 2005;3:499–504. <https://doi.org/10.1038/nrmicro1162>.
- 1000 [40] Kong Y, Kuzyakov Y, Ruan Y, Zhang J, Wang T, Wang M, *et al.* DNA stable-isotope probing  
1001 delineates carbon flows from rice residues into soil microbial communities depending on  
1002 fertilization. *Appl Environ Microbiol* 2020;86:e02151-19, /aem/86/7/AEM.02151-19.atom.  
1003 <https://doi.org/10.1128/AEM.02151-19>.
- 1004 [41] Kaplan H, Ratering S, Felix-Henningsen P, Schnell S. Stability of in situ immobilization of trace  
1005 metals with different amendments revealed by microbial <sup>13</sup>C-labelled wheat root  
1006 decomposition and efflux-mediated metal resistance of soil bacteria. *Science of The Total*  
1007 *Environment* 2019;659:1082–9. <https://doi.org/10.1016/j.scitotenv.2018.12.441>.
- 1008 [42] Ai C, Liang G, Sun J, Wang X, He P, Zhou W, *et al.* Reduced dependence of rhizosphere  
1009 microbiome on plant-derived carbon in 32-year long-term inorganic and organic fertilized soils.  
1010 *Soil Biology and Biochemistry* 2015;80:70–8. <https://doi.org/10.1016/j.soilbio.2014.09.028>.
- 1011 [43] Uksa M, Buegger F, Gschwendtner S, Lueders T, Kublik S, Kautz T, *et al.* Bacteria utilizing plant-  
1012 derived carbon in the rhizosphere of *Triticum aestivum* change in different depths of an arable  
1013 soil: spatial distribution of rhizosphere bacteria. *Environmental Microbiology Reports*  
1014 2017;9:729–41. <https://doi.org/10.1111/1758-2229.12588>.
- 1015 [44] Donn S, Kirkegaard JA, Perera G, Richardson AE, Watt M. Evolution of bacterial communities in  
1016 the wheat crop rhizosphere: Rhizosphere bacteria in field-grown intensive wheat crops.  
1017 *Environ Microbiol* 2015;17:610–21. <https://doi.org/10.1111/1462-2920.12452>.
- 1018 [45] Lofgren LA, Uehling JK, Branco S, Bruns TD, Martin F, Kennedy PG. Genome-based estimates of  
1019 fungal rDNA copy number variation across phylogenetic scales and ecological lifestyles. *Mol*  
1020 *Ecol* 2019;28:721–30. <https://doi.org/10.1111/mec.14995>.
- 1021 [46] Sun D-L, Jiang X, Wu QL, Zhou N-Y. Intragenomic heterogeneity of 16S rRNA genes causes  
1022 overestimation of prokaryotic diversity. *Appl Environ Microbiol* 2013;79:5962–9.  
1023 <https://doi.org/10.1128/AEM.01282-13>.
- 1024 [47] Newitt JT, Prudence SMM, Hutchings MI, Worsley SF. Biocontrol of cereal crop diseases using  
1025 *Streptomyces*. *Pathogens* 2019;8:78. <https://doi.org/10.3390/pathogens8020078>.

- 1026 [48] Garbeva P, van Elsas JD, van Veen JA. Rhizosphere microbial community and its response to  
1027 plant species and soil history. *Plant Soil* 2008;302:19–32. [https://doi.org/10.1007/s11104-007-](https://doi.org/10.1007/s11104-007-9432-0)  
1028 9432-0.
- 1029 [49] Réblová M, Gams W, Seifert KA. *Monilochaetes* and allied genera of the *Glomerellales*, and a  
1030 reconsideration of families in the Microascales. *Studies in Mycology* 2011;68:163–91.  
1031 <https://doi.org/10.3114/sim.2011.68.07>.
- 1032 [50] Chen H, Ma Y, Zhang WF, Ma T, Wu HX. Molecular phylogeny of *Colletotrichum*  
1033 (*Sordariomycetes: Glomerellaceae*) inferred from multiple gene sequences. *Genet Mol Res*  
1034 2015;14:13649–62. <https://doi.org/10.4238/2015.October.28.27>.
- 1035 [51] Ghosh R, Bhadra S, Bandyopadhyay M. Morphological and molecular characterization of  
1036 *Colletotrichum capsici* causing leaf-spot of soybean. *Trop Plant Res* 2016;3:481–90.  
1037 <https://doi.org/10.22271/tpr.2016.v3.i3.064>.
- 1038 [52] Zhang N, Castlebury LA, Miller AN, Huhndorf SM, Schoch CL, Seifert KA, *et al.* An overview of  
1039 the systematics of the *Sordariomycetes* based on a four-gene phylogeny n.d.:13.
- 1040 [53] Kowal J, Pressel S, Duckett JG, Bidartondo MI, Field KJ. From rhizoids to roots? Experimental  
1041 evidence of mutualism between liverworts and ascomycete fungi. *Annals of Botany*  
1042 2018;121:221–7. <https://doi.org/10.1093/aob/mcx126>.
- 1043 [54] Midgley DJ, Greenfield P, Bissett A, Tran-Dinh N. First evidence of *Pezoloma ericae* in Australia:  
1044 using the Biomes of Australia Soil Environments (BASE) to explore the Australian  
1045 phylogeography of known ericoid mycorrhizal and root-associated fungi. *Mycorrhiza*  
1046 2017;27:587–94. <https://doi.org/10.1007/s00572-017-0769-9>.
- 1047 [55] Hambleton S, Sigler L. *Meliniomyces*, a new anamorph genus for root-associated fungi with  
1048 phylogenetic affinities to *Rhizoscyphus ericae* ( $\equiv$  *Hymenoscyphus ericae*), *Leotiomyces*.  
1049 *Studies in Mycology* 2005;53:1–27. <https://doi.org/10.3114/sim.53.1.1>.
- 1050 [56] Alves RJE, Minh BQ, Urich T, von Haeseler A, Schleper C. Unifying the global phylogeny and  
1051 environmental distribution of ammonia-oxidising archaea based on *amoA* genes. *Nat Commun*  
1052 2018;9:1517. <https://doi.org/10.1038/s41467-018-03861-1>.
- 1053 [57] Neufeld JD, Vohra J, Dumont MG, Lueders T, Manfield M, Friedrich MW, *et al.* DNA stable-  
1054 isotope probing. *Nat Protoc* 2007;2:860–6. <https://doi.org/10.1038/nprot.2007.109>.
- 1055 [58] Parks DH, Chuvochina M, Chaumeil P-A, Rinke C, Mussig AJ, Hugenholtz P. A complete domain-  
1056 to-species taxonomy for Bacteria and Archaea. *Nat Biotechnol* 2020;38:1079–86.  
1057 <https://doi.org/10.1038/s41587-020-0501-8>.
- 1058 [59] Fan K, Cardona C, Li Y, Shi Y, Xiang X, Shen C, *et al.* Rhizosphere-associated bacterial network  
1059 structure and spatial distribution differ significantly from bulk soil in wheat crop fields. *Soil*  
1060 *Biology and Biochemistry* 2017;113:275–84. <https://doi.org/10.1016/j.soilbio.2017.06.020>.
- 1061 [60] Fernández FA, Huhndorf SM. New species of *Chaetosphaeria*, *Melanopsammella* and  
1062 *Tainosphaeria* gen. nov. from the Americas. *Fungal Diversity* n.d.:43.
- 1063 [61] Zhang Y, Crous PW, Schoch CL, Hyde KD. Pleosporales. *Fungal Diversity* 2012;53:1–221.  
1064 <https://doi.org/10.1007/s13225-011-0117-x>.
- 1065 [62] Oliver R, Lichtenzweig J, Tan K-C, Waters O, Rybak K, Lawrence J, *et al.* Absence of detectable  
1066 yield penalty associated with insensitivity to Pleosporales necrotrophic effectors in wheat  
1067 grown in the West Australian wheat belt. *Plant Pathol* 2014;63:1027–32.  
1068 <https://doi.org/10.1111/ppa.12191>.
- 1069 [63] Shariffah-Muzaimah SA, Idris AS, Madihah AZ, Dzolkhifli O, Kamaruzzaman S, Maizatul-Suriza  
1070 M. Characterization of *Streptomyces* spp. isolated from the rhizosphere of oil palm and  
1071 evaluation of their ability to suppress basal stem rot disease in oil palm seedlings when applied  
1072 as powder formulations in a glasshouse trial. *World J Microbiol Biotechnol* 2018;34:15.  
1073 <https://doi.org/10.1007/s11274-017-2396-1>.
- 1074 [64] Worsley SF, Newitt J, Rassbach J, Batey SFD, Holmes NA, Murrell JC, *et al.* *Streptomyces*  
1075 endophytes promote host health and enhance growth across plant species. *Appl Environ*



- 1076 Microbiol 2020;86:e01053-20, /aem/86/16/AEM.01053-20.atom.  
1077 <https://doi.org/10.1128/AEM.01053-20>.
- 1078 [65] Carrión VJ, Cordovez V, Tyc O, Etalo DW, de Bruijn I, de Jager VCL, *et al.* Involvement of  
1079 *Burkholderiaceae* and sulfurous volatiles in disease-suppressive soils. ISME J 2018;12:2307–21.  
1080 <https://doi.org/10.1038/s41396-018-0186-x>.
- 1081 [66] Macey MC, Pratscher J, Crombie AT, Murrell JC. Impact of plants on the diversity and activity of  
1082 methylophs in soil. Microbiome 2020;8:31. <https://doi.org/10.1186/s40168-020-00801-4>.
- 1083 [67] Mercado-Blanco J, Bakker PAHM. Interactions between plants and beneficial *Pseudomonas*  
1084 spp.: exploiting bacterial traits for crop protection. Antonie van Leeuwenhoek 2007;92:367–89.  
1085 <https://doi.org/10.1007/s10482-007-9167-1>.
- 1086 [68] Rico A, McCraw SL, Preston GM. The metabolic interface between *Pseudomonas syringae* and  
1087 plant cells. Current Opinion in Microbiology 2011;14:31–8.  
1088 <https://doi.org/10.1016/j.mib.2010.12.008>.
- 1089 [69] Chaparro JM, Badri DV, Bakker MG, Sugiyama A, Manter DK, Vivanco JM. Root exudation of  
1090 phytochemicals in *Arabidopsis* follows specific patterns that are developmentally programmed  
1091 and correlate with soil microbial functions. PLoS ONE 2013;8:e55731.  
1092 <https://doi.org/10.1371/journal.pone.0055731>.
- 1093 [70] Badri DV, Chaparro JM, Zhang R, Shen Q, Vivanco JM. Application of natural blends of  
1094 phytochemicals derived from the root exudates of *Arabidopsis* to the soil reveal that phenolic-  
1095 related compounds predominantly modulate the soil microbiome. J Biol Chem 2013;288:4502–  
1096 12. <https://doi.org/10.1074/jbc.M112.433300>.
- 1097 [71] Ortet P, Barakat M, Lalaouna D, Fochesato S, Barbe V, Vacherie B, *et al.* Complete genome  
1098 sequence of a beneficial plant root-associated bacterium, *Pseudomonas brassicacearum* n.d.:1.  
1099 [72] Silby MW, Cerdeño-Tárraga AM, Vernikos GS, Giddens SR, Jackson RW, Preston GM, *et al.*  
1100 Genomic and genetic analyses of diversity and plant interactions of *Pseudomonas fluorescens*.  
1101 Genome Biol 2009;10:R51. <https://doi.org/10.1186/gb-2009-10-5-r51>.
- 1102 [73] Worsley SF, Macey M, Prudence S, Wilkinson B, Murrell JC, Hutchings MI. Investigating the role  
1103 of root exudates in recruiting *Streptomyces* bacteria to the *Arabidopsis thaliana* root  
1104 microbiome. Microbiology; 2020. <https://doi.org/10.1101/2020.09.09.290742>.
- 1105 [74] Fitzpatrick CR, Copeland J, Wang PW, Guttman DS, Kotanen PM, Johnson MTJ. Assembly and  
1106 ecological function of the root microbiome across angiosperm plant species. Proc Natl Acad Sci  
1107 USA 2018;115:E1157–65. <https://doi.org/10.1073/pnas.1717617115>.
- 1108 [75] Chater KF, Biró S, Lee KJ, Palmer T, Schrepf H. The complex extracellular biology of  
1109 *Streptomyces*. FEMS Microbiol Rev 2010;34:171–98. <https://doi.org/10.1111/j.1574-6976.2009.00206.x>.
- 1110 [76] Carrias J-F, Gerphagnon M, Rodríguez-Pérez H, Borrel G, Loiseau C, Corbara B, *et al.* Resource  
1111 availability drives bacterial succession during leaf-litter decomposition in a bromeliad  
1112 ecosystem. FEMS Microbiology Ecology 2020;96:fiaa045.  
1113 <https://doi.org/10.1093/femsec/fiaa045>.
- 1114 [77] Purahong W, Wubet T, Lentendu G, Schloter M, Pecyna MJ, Kapturska D, *et al.* Life in leaf litter:  
1115 novel insights into community dynamics of bacteria and fungi during litter decomposition. Mol  
1116 Ecol 2016;25:4059–74. <https://doi.org/10.1111/mec.13739>.
- 1117 [78] de Melo RR, Tomazetto G, Persinoti GF, Sato HH, Ruller R, Squina FM. Unravelling the  
1118 cellulolytic and hemicellulolytic potential of two novel *Streptomyces* strains. Ann Microbiol  
1119 2018;68:677–88. <https://doi.org/10.1007/s13213-018-1374-7>.
- 1120 [79] Moe LA. Amino acids in the rhizosphere: From plants to microbes. American Journal of Botany  
1121 2013;100:1692–705. <https://doi.org/10.3732/ajb.1300033>.
- 1122 [80] Kandeler E, Gerber H. Short-term assay of soil urease activity using colorimetric determination  
1123 of ammonium. Biol Fert Soils 1988;6. <https://doi.org/10.1007/BF00257924>.
- 1124 [81] Miranda KM, Espey MG, Wink DA. A rapid, simple spectrophotometric method for  
1125 simultaneous detection of nitrate and nitrite 2001:10.  
1126

- 1127 [82] Bolyen E, Rideout JR, Dillon MR, Bokulich NA, Abnet CC, Al-Ghalith GA, *et al.* Reproducible,  
1128 interactive, scalable and extensible microbiome data science using QIIME 2. *Nat Biotechnol*  
1129 2019;37:852–7. <https://doi.org/10.1038/s41587-019-0209-9>.
- 1130 [83] Callahan BJ, McMurdie PJ, Rosen MJ, Han AW, Johnson AJA, Holmes SP. DADA2: High-  
1131 resolution sample inference from Illumina amplicon data. *Nat Methods* 2016;13:581–3.  
1132 <https://doi.org/10.1038/nmeth.3869>.
- 1133 [84] Glöckner FO, Yilmaz P, Quast C, Gerken J, Beccati A, Ciuprina A, *et al.* 25 years of serving the  
1134 community with ribosomal RNA gene reference databases and tools. *Journal of Biotechnology*  
1135 2017;261:169–76. <https://doi.org/10.1016/j.jbiotec.2017.06.1198>.
- 1136 [85] Nilsson RH, Larsson K-H, Taylor AFS, Bengtsson-Palme J, Jeppesen TS, Schigel D, *et al.* The  
1137 UNITE database for molecular identification of fungi: handling dark taxa and parallel taxonomic  
1138 classifications. *Nucleic Acids Research* 2019;47:D259–64.  
1139 <https://doi.org/10.1093/nar/gky1022>.
- 1140 [86] R Core Team. R: A language and environment for statistical computing. Vienna, Austria.: R  
1141 Foundation for Statistical Computing; 2020.
- 1142 [87] Jari O, Blanchet FG, Friendly M, Roeland K, Legendre P, Minchin PR, *et al.* vegan: Community  
1143 Ecology Package. R package version 2.5-6 2019.
- 1144 [88] Clarke KR. Non-parametric multivariate analyses of changes in community structure. *Austral*  
1145 *Ecol* 1993;18:117–43. <https://doi.org/10.1111/j.1442-9993.1993.tb00438.x>.
- 1146 [89] McMurdie PJ, Holmes S. phyloseq: An R package for reproducible interactive analysis and  
1147 graphics of microbiome census data. *PLoS ONE* 2013;8:e61217.  
1148 <https://doi.org/10.1371/journal.pone.0061217>.
- 1149 [90] Ssekagiri A. microbiomeSeq: Microbial community analysis in an environmental context.. R  
1150 package version 0.1. 2020.
- 1151 [91] Dorn-In S, Bassitta R, Schwaiger K, Bauer J, Hölzel CS. Specific amplification of bacterial DNA by  
1152 optimized so-called universal bacterial primers in samples rich of plant DNA. *Journal of*  
1153 *Microbiological Methods* 2015;7.
- 1154 [92] Lehtovirta LE, Prosser JI, Nicol GW. Soil pH regulates the abundance and diversity of Group 1.1c  
1155 Crenarchaeota. *FEMS Microbiol Ecol* 2009;10.
- 1156 [93] Chemidlin Prévost-Bouré N, Christen R, Dequiedt S, Mougél C, Lelièvre M, Jolivet C, *et al.*  
1157 Validation and Application of a pcr primer set to quantify fungal communities in the soil  
1158 environment by real-time quantitative PCR. *PLoS ONE* 2011;6:e24166.  
1159 <https://doi.org/10.1371/journal.pone.0024166>.
- 1160 [94] Muyzer G, de Waal EC, Uitterlinden AG. Profiling of complex microbial populations by  
1161 denaturing gradient gel electrophoresis analysis of polymerase chain reaction-amplified genes  
1162 coding for 16S rRNA. *Applied and Environmental Microbiology* 1993;59:695–700.  
1163 <https://doi.org/10.1128/AEM.59.3.695-700.1993>.
- 1164 [95] Ochsenreiter T, Selezi D, Quaiser A, Bonch-Osmolovskaya L, Schleper C. Diversity and  
1165 abundance of Crenarchaeota in terrestrial habitats studied by 16S RNA surveys and real time  
1166 PCR. *Environ Microbiol* 2003;5:787–97. <https://doi.org/10.1046/j.1462-2920.2003.00476.x>.
- 1167 [96] Großkopf R, Janssen PH, Liesack W. Diversity and structure of the methanogenic community in  
1168 anoxic rice paddy soil microcosms as examined by cultivation and direct 16S rRNA gene  
1169 sequence retrieval. *Appl Environ Microbiol* 1998;64:960–9.  
1170 <https://doi.org/10.1128/AEM.64.3.960-969.1998>.
- 1171 [97] Gantner S, Andersson AF, Alonso-Sáez L, Bertilsson S. Novel primers for 16S rRNA-based  
1172 archaeal community analyses in environmental samples. *Journal of Microbiological Methods*  
1173 2011;84:12–8. <https://doi.org/10.1016/j.mimet.2010.10.001>.
- 1174 [98] Yu Y, Lee C, Kim J, Hwang S. Group-specific primer and probe sets to detect methanogenic  
1175 communities using quantitative real-time polymerase chain reaction. *Biotechnol Bioeng*  
1176 2005;89:670–9. <https://doi.org/10.1002/bit.20347>.

- 1177 [99] Ihrmark K, Bödeker ITM, Cruz-Martinez K, Friberg H, Kubartova A, Schenck J, *et al.* New primers  
1178 to amplify the fungal ITS2 region - evaluation by 454-sequencing of artificial and natural  
1179 communities. *FEMS Microbiol Ecol* 2012;82:666–77. [https://doi.org/10.1111/j.1574-](https://doi.org/10.1111/j.1574-6941.2012.01437.x)  
1180 [6941.2012.01437.x](https://doi.org/10.1111/j.1574-6941.2012.01437.x).
- 1181 [100] White TJ, Bruns T, Lee S, Taylor J. Amplification and direct sequencing of fungal ribosomal rna  
1182 genes for phylogenetics. *PCR Protocols*, Elsevier; 1990, p. 315–22.  
1183 <https://doi.org/10.1016/B978-0-12-372180-8.50042-1>.
- 1184 [101] Vainio EJ, Hantula J. Direct analysis of wood-inhabiting fungi using denaturing gradient gel  
1185 electrophoresis of amplified ribosomal DNA n.d.:10.
- 1186 [102] Fredriksson NJ, Hermansson M, Wilén B-M. The choice of PCR Primers has great impact on  
1187 assessments of bacterial community diversity and dynamics in a wastewater treatment plant.  
1188 *PLOS ONE* 2013;8:20.
- 1189 [103] Rastogi G. A PCR-based toolbox for the culture-independent quantification of total bacterial  
1190 abundances in plant environments. *Journal of Microbiological Methods* 2010:6.
- 1191 [104] Takai K, Horikoshi K. Rapid detection and quantification of members of the archaeal  
1192 community by quantitative pcr using fluorogenic probes. *Appl Environ Microbiol*  
1193 2000;66:5066–72. <https://doi.org/10.1128/AEM.66.11.5066-5072.2000>.
- 1194 [105] Tourna M, Freitag TE, Nicol GW, Prosser JI. Growth, activity and temperature responses of  
1195 ammonia-oxidizing archaea and bacteria in soil microcosms. *Environmental Microbiology*  
1196 2008:9.
